# Coordinated drift of receptive fields during noisy representation learning

Shanshan Qin<sup>1,2</sup>, Shiva Farashahi<sup>3,†</sup>, David Lipshutz<sup>3,†</sup>, Anirvan M. Sengupta<sup>3,4</sup>, Dmitri B. Chklovskii<sup>3,5</sup>, and Cengiz Pehlevan <sup>\*1,2</sup>

<sup>1</sup>*John A. Paulson School of Engineering and Applied Sciences, Harvard University, Cambridge, MA 02138, U.S.A*

<sup>2</sup>*Center for Brain Science, Harvard University, Cambridge, MA 02138, U.S.A*

<sup>3</sup>*Center for Computational Neuroscience, Flatiron Institute, New York, NY 10010, U.S.A*

<sup>4</sup>*Department of Physics and Astronomy, Rutgers University, New Brunswick, NJ 08901, U.S.A*

<sup>5</sup>*NYU Langone Medical Center, New York, NY 10016, U.S.A*

## Abstract

Long-term memories and learned behavior are conventionally associated with stable neuronal representations. However, recent experiments showed that neural population codes in many brain areas continuously change even when animals have fully learned and stably perform their tasks. This representational “drift” naturally leads to questions about its causes, dynamics, and functions. Here, we explore the hypothesis that neural representations optimize a representational objective with a degenerate solution space, and noisy synaptic updates drive the network to explore this (near-)optimal space causing representational drift. We illustrate this idea in simple, biologically plausible Hebbian/anti-Hebbian network models of representation learning, which optimize similarity matching objectives, and, when neural outputs are constrained to be nonnegative, learn localized receptive fields (RFs) that tile the stimulus manifold. We find that the drifting RFs of individual neurons can be characterized by a coordinated random walk, with the effective diffusion constants depending on various parameters such as learning rate, noise amplitude, and input statistics. Despite such drift, the representational similarity of population codes is stable over time. Our model recapitulates recent experimental observations in hippocampus and posterior parietal cortex, and makes testable predictions that can be probed in future experiments.

---

\*Corresponding author. E-mail: [cpehlevan@seas.harvard.edu](mailto:cpehlevan@seas.harvard.edu)

†These authors contributed equally to this work

## 29 Introduction

30 Memories and learned behavior can be stable for a long time. We can recall vividly the memory  
31 of events that happened years ago. Motor skills, such as riding a bike, once learned, can  
32 last life-long even without further practice. A natural question is then whether stable task  
33 performance and memories are related to stable neuronal representations.

34 Recent technical advances in electrophysiology and optical imaging enabled researchers  
35 to address this question by studying the long-term dynamics of neural population activity in  
36 awake behaving animals (Katlowitz, Picardo, and Long 2018; Li et al. 2017; Luo et al. 2020;  
37 Schoonover et al. 2021; Ulivi et al. 2019; Y. Ziv et al. 2013). A number of these experiments  
38 have shown that neuronal activities in cortical areas that are essential for specific tasks un-  
39 dergo continuous reorganization even after the animals have fully learned their tasks, a phe-  
40 nomenon termed “representational drift” (Mau, Hasselmo, and Cai 2020; Rule, O’Leary, and  
41 Harvey 2019). For instance, in sensorimotor tasks, neuronal representations in the posterior  
42 parietal cortex (PPC) of mice change across days while the performance of animals remain  
43 stable and high (Driscoll et al. 2017). Place fields of individual place cells in CA1 region of  
44 hippocampus drift over days and weeks even when the animals remain in the same familiar  
45 environment (Gonzalez et al. 2019; Lee et al. 2020; Y. Ziv et al. 2013). Individual neurons in  
46 the primary motor cortex and supplementary motor cortex show unstable tuning while animals  
47 perform highly stereotyped motor tasks (Rokni et al. 2007) (but see (Chestek et al. 2007; Gal-  
48 lego et al. 2020)). Representational drift has been observed even in primary sensory cortices,  
49 such as mouse visual cortex (Deitch, Rubin, and Y. Ziv 2021; Marks and Goard 2021) and  
50 piriform cortex (Schoonover et al. 2021). The ubiquity of representational drift raises several  
51 important questions: What is the underlying mechanism of such drift? How can neural cir-  
52 cuits generate stable coding in the presence of continuous drift? What are the dynamics of  
53 representational drift?

54 To address these issues, we consider a setting where a neural population learns to rep-  
55 resent stimuli in a way that optimizes a representational objective. Such a normative account  
56 of sensory representations is common in neuroscience (Atick and Redlich 1992; Attneave  
57 1954; Barlow 1961; Chalk, Marre, and Tkacik 2018; Hateren 1992; Olshausen and Field  
58 1997; Pehlevan, Hu, and Chklovskii 2015; Rao and Ballard 1999; Srinivasan, Laughlin, and  
59 Dubs 1982). Furthermore, the representational objective we consider has many solutions,  
60 consistent with the notion that there are many optimal neural representations of input stimuli.  
61 Based on the observations that synapses in the cortex are highly dynamic (Attardo, Fitzgerald,  
62 and Schnitzer 2015; Hazan and N. E. Ziv 2020; Rumpel and Triesch 2016), we hypothesize  
63 that noisy synaptic updates during learning will drive the network to explore the synaptic weight  
64 space that corresponds to (near-)optimal neural representations. In other words, the neural

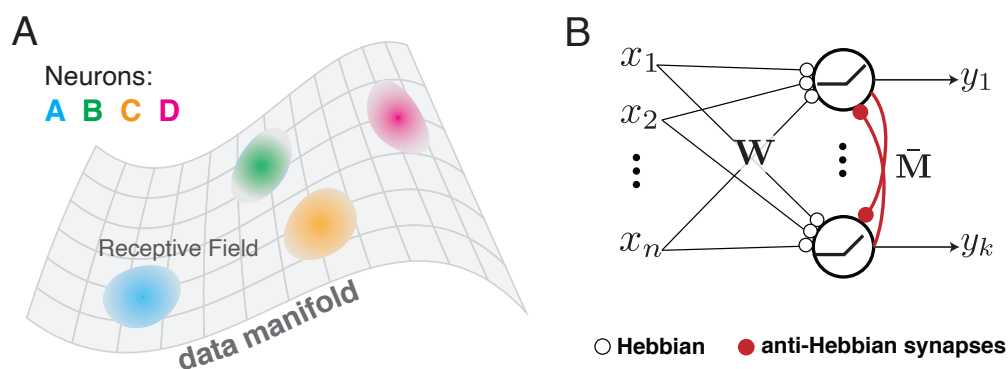

**Figure 1:** (A) Illustration of localized receptive fields that tile the data manifold. (B) Hebbian/anti-Hebbian network with nonnegative neural activity can learn localized receptive fields.

65 representation will drift within the space of optimal representations.

66 To test this hypothesis, we focus on a well-studied biologically plausible network for repre-  
 67 sentation learning: the Hebbian/anti-Hebbian network (Földiak 1990; Pehlevan and Chklovskii  
 68 2019) (Fig. 1B). These networks optimize similarity matching objectives which exhibit a de-  
 69 degeneracy of optimal representational solutions (Pehlevan, Sengupta, and Chklovskii 2018), all  
 70 of which share the same representational similarity matrix (Kriegeskorte, Mur, and Bandettini  
 71 2008). Hebbian/anti-Hebbian networks have also been shown to learn localized RFs that tile  
 72 the input data manifold (Sengupta et al. 2018), hence they can be used as simplified models for  
 73 brain areas where neurons have localized receptive fields (RFs), such as hippocampal place  
 74 cells and neurons in PPC (Driscoll et al. 2017; Gonzalez et al. 2019; Y. Ziv et al. 2013). In  
 75 these systems, population of neurons with different localized RFs generally tile the parameter  
 76 space they encode (Fig. 1A). The simplicity and mathematical-tractability make Hebbian/anti-  
 77 Hebbian networks an excellent starting point to elucidate the mechanism and properties of  
 78 representational drift due to noise in synaptic updates.

79 By numerical and analytical methods, we find that while the RFs of individual neurons  
 80 change significantly over time, the representational similarity of population codes is stable. We  
 81 show that the drift dynamics of individual RFs can be largely captured by a random walk on the  
 82 data manifold, with the effective diffusion constant depending on noise amplitude, learning rate  
 83 and other model parameters such as the number of output neurons. At the population level,  
 84 the drifting RFs are coordinated in a way that preserves representational similarity. Our model  
 85 accounts for many of the recent experimental observations in the hippocampus and PPC, and  
 86 makes testable predictions. Overall, our results show how optimal representation learning and  
 87 noise can lead to representational drift while maintaining representational similarity.

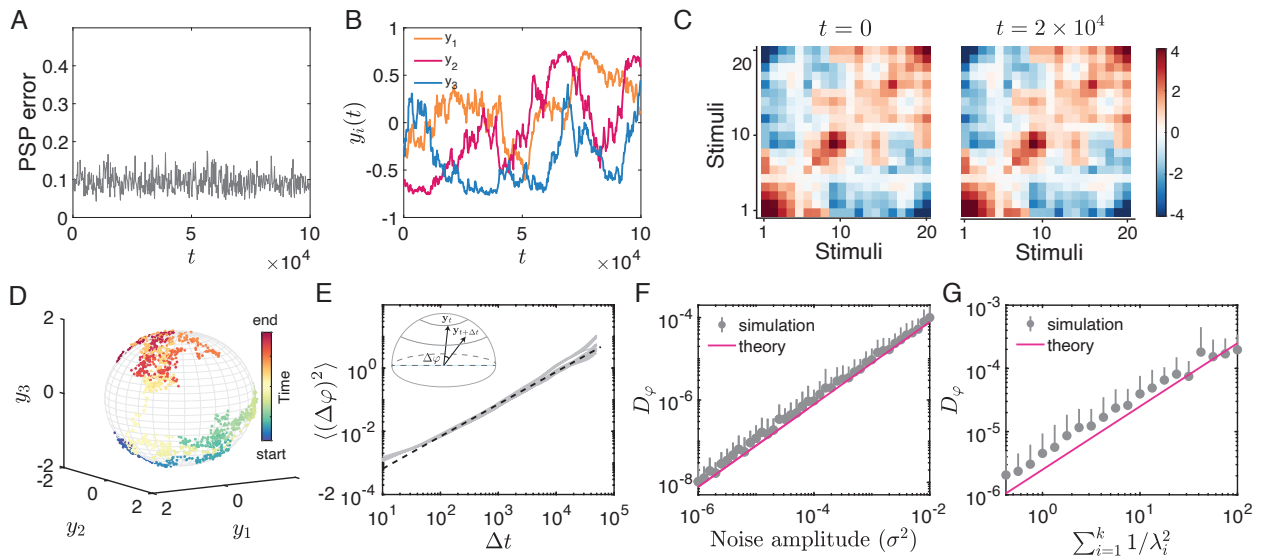

**Figure 2:** Drift dynamics in principal subspace projection (PSP) task. In the simulation, each input  $\mathbf{x}_t \in \mathbf{R}^{10}$  is drawn independently from a joint Gaussian distribution  $\mathcal{N}(\mathbf{0}, \mathbf{C})$ . The first three eigenvalues of the covariance matrix  $\mathbf{C}$  are: 4.5, 3.5, 1 and the rest are 0.1. A Hebbian/anti-Hebbian network learns to project this input to  $k = 3$  dimensions. (A) PSP error remains stable after the task has been learned even with noisy synapse update. (B) The learned representation of an example input continuously changes due to noisy updates. Shown are the 3 component of  $\mathbf{y}(t)$ . (C) Pairwise similarity between learned representations are stable over time, as shown by the almost identical similarity matrices at  $t = 0$  (left) and  $t = 2 \times 10^4$  (right). (D) Drifting representation as a random walk on a “sphere”, showing the representation of a single sample  $\mathbf{y}_t$  over time. Color codes for different time steps. (E) Estimating rotational diffusion constant  $D_\varphi$  from mean squared angular displacement (MSAD). Grey lines are MSAD estimated based on individual representation trajectory  $\mathbf{y}(t)$ . The dashed line is a linear fit between  $\langle (\Delta\varphi)^2 \rangle \equiv \langle (\varphi(t + \Delta t) - \varphi(t))^2 \rangle$  and  $\Delta t$  to estimate the rotational diffusion constant. Inset: illustration of  $\Delta\varphi$ . (F) Relationship between  $D_\varphi$  and noise amplitude  $\sigma^2$ . Symbol with error bars are numerical simulation, and the solid line is the theory Eq.5. (G) Dependence of  $D_\varphi$  on the eigenspectrum  $\{\lambda_i\}$  of the input covariance matrix. Error bars represent standard deviation, only one side is shown to reduce cluttering. In all the figures  $t = 0$  is the starting point when the representation is learned. Parameters:  $n = 10, k = 3, \eta = 0.1, \sigma_1 = \sigma_2 = 0.01, T = 10^4$ .

## 88 Results

### 89 Drift dynamics in linear Hebbian/anti-Hebbian networks

90 We first study drift in linear Hebbian/anti-Hebbian networks, which compress inputs into a  
 91 lower dimensional space (Pehlevan, Hu, and Chklovskii 2015). While the resulting RFs are not  
 92 localized, it is still instructive to study how learned representations evolve with noisy synaptic  
 93 updates in this analytically tractable model.

94 The network we consider minimizes a similarity matching cost function (Pehlevan, Hu, and  
 95 Chklovskii 2015). Here, the similarity between two vectors is defined as their dot product. Let  
 96  $\mathbf{x}_t \in \mathbf{R}^n, t = 1, \dots, T$  be a set of network inputs (or sensory stimulus) and  $\mathbf{y}_t \in \mathbf{R}^k, k < n$   
 97 be the corresponding outputs constituting a representation. Similarity matching minimizes the  
 98 mismatch between the similarity of pairs of inputs and corresponding pairs of outputs

$$\min_{\forall t: \mathbf{y}_t} \frac{1}{T^2} \sum_{t=1}^T \sum_{t'=1}^T (\mathbf{x}_t^\top \mathbf{x}_{t'} - \mathbf{y}_t^\top \mathbf{y}_{t'})^2. \quad (1)$$

99 Optimal solutions to this problem are given by projecting the inputs to their principal subspace  
 100 (Pehlevan, Hu, and Chklovskii 2015). However, there is a continuum of such projections each  
 101 corresponding to a basis in the subspace. This degeneracy can be seen from the rotational  
 102 symmetry of the similarity matching cost function, (1). For any set of  $\mathbf{y}_t$ ,  $\mathbf{R}\mathbf{y}_t$  has the same  
 103 cost, where  $\mathbf{R}$  is an orthogonal matrix.

104 Previous work showed that this cost function can be minimized by a neural network in an  
 105 online manner, where each input  $\mathbf{x}_t$  is presented sequentially and an output  $\mathbf{y}_t$  is produced  
 106 (Pehlevan, Hu, and Chklovskii 2015) (Materials and Methods) by running the following neural  
 107 dynamics until convergence:

$$\dot{\mathbf{y}}_t = \mathbf{W}\mathbf{x}_t - \mathbf{M}\mathbf{y}_t. \quad (2)$$

108 Here,  $\mathbf{W}$  holds the feedforward synaptic weights and  $\mathbf{M}$  the lateral weights. We note that  
 109 at the fixed point of the neural dynamics  $\mathbf{y}_t = \mathbf{M}^{-1}\mathbf{W}\mathbf{x}_t = \mathbf{F}\mathbf{x}_t$ , where we define a filter  
 110 matrix,  $\mathbf{F} \equiv \mathbf{M}^{-1}\mathbf{W}$ , whose rows are neural filters. After each presentation of an input and  
 111 convergence of the neural dynamics, the weights  $\mathbf{W}$  and  $\mathbf{M}$  are updated with a Hebbian and  
 112 anti-Hebbian rule, respectively:

$$\Delta\mathbf{W} = \eta(\mathbf{y}_t\mathbf{x}_t - \mathbf{W}), \quad \Delta\mathbf{M} = \eta(\mathbf{y}_t\mathbf{y}_t^\top - \mathbf{M}). \quad (3)$$

113 The learning rule is local in the sense that synaptic update only depends on activities of presy-  
 114 naptic and postsynaptic neurons. The update of  $\mathbf{M}$  is anti-Hebbian due to the negation in (2).  
 115 As the number of samples increases, these weights converge to a configuration where neural  
 116 filters learn an orthonormal basis for the principal space (Pehlevan, Hu, and Chklovskii 2015;  
 117 Pehlevan, Sengupta, and Chklovskii 2018).

118 Here, we model biological noise during learning by introducing noise to the weight updates,  
 119 and examine the consequences of this noise. The updates are

$$\Delta\mathbf{W}(t) = \eta(\mathbf{y}_t\mathbf{x}_t^\top - \mathbf{W}(t)) + \boldsymbol{\xi}^W, \quad \Delta\mathbf{M}(t) = \eta(\mathbf{y}_t\mathbf{y}_t^\top - \mathbf{M}(t)) + \boldsymbol{\xi}^M, \quad (4)$$

120 where the noise terms  $\xi_{ij}^W, \xi_{ij}^M$  are independent Gaussian noise, with the following statistics:  
 121  $\langle \xi_{ij}^W(t) \rangle = \langle \xi_{ij}^M(t) \rangle = 0$  and  $\langle (\xi_{ij}^W(t)\xi_{kl}^W(t')) \rangle = \eta\sigma_1^2\delta_{ik}\delta_{jl}\delta(t-t')$ ,  $\langle \xi_{ij}^M(t)\xi_{kl}^M(t') \rangle = \eta\sigma_2^2\delta_{ik}\delta_{jl}\delta(t-t')$ .  
 122

123 As expected, the network learns the principle subspace and maintains a stable perfor-  
 124 mance, as quantified by the principle subspace projection (PSP) error:  $\|\mathbf{F}_t^\top\mathbf{F}_t - \mathbf{U}\mathbf{U}^\top\|_F / \|\mathbf{U}\mathbf{U}^\top\|_F$   
 125 where  $\mathbf{U}$  is a  $n \times k$  matrix whose columns are the top  $k$  left singular vector of  $\mathbf{X}$  (Fig. 2A). Due  
 126 to the synaptic noise, network weights do not settle down to fixed points but roam around in the  
 127 subspace that gives equally good solutions to the similarity matching problem. Consequently,  
 128 the representation of a given stimulus  $\mathbf{y}_t$  drifts over time (Fig. 2B). However, the similarity  
 129 between any two outputs  $\mathbf{y}_t$  and  $\mathbf{y}_{t'}$  remains stable (Fig. 2C, SI Appendix Fig. S1A). As a

130 consequence, the drift does not change the length of the output vectors,  $\mathbf{y}_t$ , which undergo  
131 a random walk on a spherical surface (Fig. 2D). The drift of the representation ensemble  
132  $\mathbf{Y}_t \equiv [\mathbf{y}_1, \dots, \mathbf{y}_T]$  behaves like a randomly-rotating rigid body consisting of a cloud of points  
133 (SI Appendix Fig. S1B).

134 These observations motivated us to quantify the drift rate by the rotational diffusion con-  
135 stant  $D_\varphi$  (Kämmerer, Kob, and Schilling 1997; Mazza et al. 2006) (Materials and Methods).  
136 We can derive an approximate analytical formula for  $D_\varphi$  from a linear stability analysis of the  
137 filter matrix ( $\mathbf{F}$ ) (Materials and Methods, and SI Appendix for details):

$$D_\varphi \approx \frac{1}{8} \eta (\sigma_1^2 + \sigma_2^2) \sum_{i=1}^k \frac{1}{\lambda_i^2}. \quad (5)$$

138 Here,  $\lambda_1 \geq \lambda_2 \geq \dots \geq \lambda_k$  are the ordered eigenvalues of the input covariance matrix. (5)  
139 indicates that  $D_\varphi$  is proportional to the noise amplitude (Fig. 2F). Further, the drift amplitude  
140 along each eigenvector is proportional to  $1/\lambda_i^2$ . This is analogous to the rotation of an ellipsoid  
141 rigid body due to torque. In that system, the rotation around the axis with smaller moment of  
142 inertia is easier. Predictions of (5) is well in agreement with simulations (Fig. 2E-G).

143 The above simulation and analysis demonstrate that, in this model, while the network's out-  
144 put is drifting over time, similarity of representation is preserved. This is due to a coordinated  
145 random walk in the representational space, which in the linear case can be described by a rigid  
146 body rotation. This coordinated drift explores equally optimal representations. Because the  
147 quality of a representation is quantified by its representational similarity in (1), representational  
148 similarity is preserved despite the drift. Next, we consider nonlinear networks and show that  
149 these results carry over.

## 150 Drift dynamics in nonlinear Hebbian/anti-Hebbian networks

151 RFs of neurons in many brain areas are localized in the parameter space which they represent.  
152 For example, response of neurons in primary visual cortex (V1) are tuned to orientations of  
153 gratings (Hubel 1995). Neurons in the owl's external nucleus of the inferior colliculus (ICX) are  
154 tuned to different horizontal and vertical positions, forming an auditory spatial map (Peña and  
155 Konishi 2001). Place cells in hippocampus are active when an animal is at a particular spatial  
156 location of an environment (O'Keefe and Dostrovsky 1971).

157 A nonlinear version of our Hebbian/anti-Hebbian network can capture these localized RF  
158 properties (Fig. 1B). This network minimizes a nonnegative similarity matching (NSM) cost  
159 function (Földiak 1990; Pehlevan, Hu, and Chklovskii 2015; Sengupta et al. 2018):

$$\min_{\forall t: \mathbf{y}_t \geq 0} \frac{1}{T^2} \sum_{t, t'=1}^T (\mathbf{x}_t^\top \mathbf{x}_{t'} - \mathbf{y}_t^\top \mathbf{y}_{t'} - \alpha^2)^2, \quad (6)$$

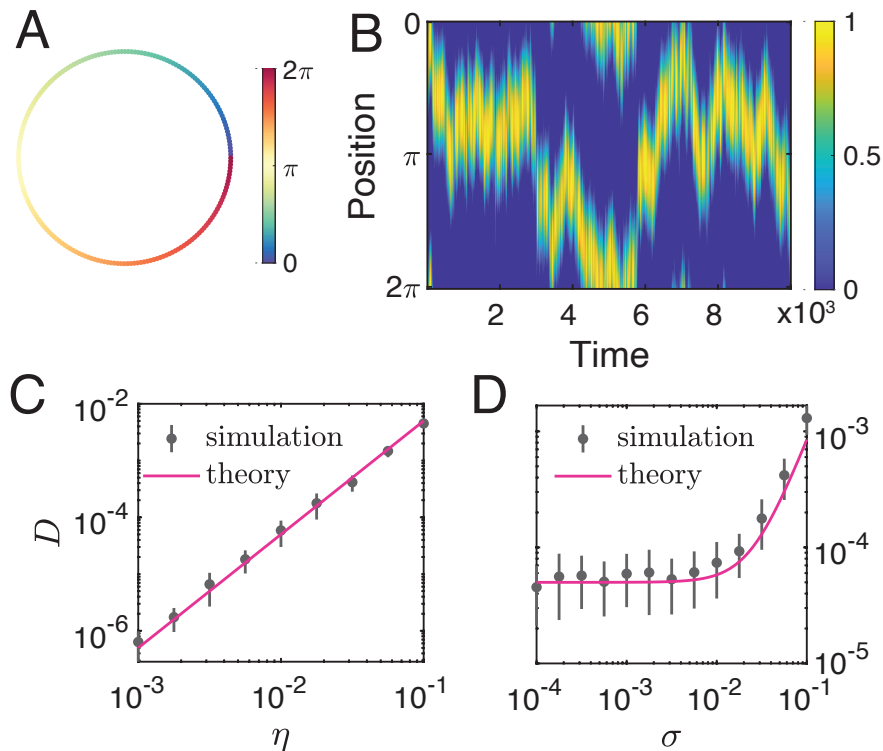

**Figure 3:** Drift of a single localized RF learned from a ring data manifold. (A) A ring in 2D as input dataset:  $\mathbf{x}(\theta) = [\cos(\theta), \sin(\theta)]^\top$ ,  $\theta \in [0, 2\pi)$ . (B) The single RF has the shape of a truncated cosine curve, whose position drift on the ring and behaves like a random walk. (C,D) The effective diffusion constant  $D$  of centroid position increases with learning rate  $\eta$  even without explicit synaptic noise ( $\sigma = 0$ ), and with the noise amplitude of explicit synaptic noise. Error bars represent standard deviation of 40 simulations. Magenta lines correspond to (9). Parameters:  $\alpha^2 = 0$ ,  $\beta_1 = \beta_2 = 0$ , in (D)  $\eta = 0.05$ .

160 where  $\mathbf{x}_t \in \mathbb{R}^n$  and  $\mathbf{y}_t \in \mathbb{R}^k$  are input and output, respectively, and  $\alpha^2$  sets the threshold of  
 161 similarity to be preserved in the output representation. With nonnegative neural activity, the  
 162 above NSM objective function strives to preserve similarity for similar pairs of input samples  
 163 but orthogonalizes the outputs corresponding to dissimilar input pairs. Compared with the  
 164 linear network, non-negativity breaks the rotational symmetry of the solution, but the permu-  
 165 tation symmetry is still preserved, i.e., exchanging identities of neurons does not change the  
 166 objective function. To see this more clearly, the above target function can be written in terms  
 167 of input-output Gram matrices:  $\|\mathbf{X}^\top \mathbf{X} - \mathbf{Y}^\top \mathbf{Y} - \alpha^2 \mathbf{E}\|_F^2$ , where  $\mathbf{X} \in \mathbb{R}^{n \times T}$ ,  $\mathbf{Y} \in \mathbb{R}^{k \times T}$ , and  
 168  $\mathbf{E} \in \mathbb{R}^{T \times T}$  is a matrix with all entries set to 1. Thus, if  $\mathbf{Y}$  is a solution, then  $\mathbf{P}\mathbf{Y}$  is also a  
 169 solution for any permutation matrix  $\mathbf{P}$ . Note that a general rotation would not preserve the  
 170 nonnegativity of the output and thus not lead to a new solution. One can further control the  
 171 behavior of learned representations by introducing regularizers to  $\mathbf{y}_t$  in (6), for example an  $l_1$   
 172 norm of  $\mathbf{y}$  leads to more sparse code (Materials and Methods).

173 Similar to the previous linear Hebbian/anti-Hebbian network, this network also operates in  
 174 an online fashion with a similar local learning rule. It takes an input  $\mathbf{x}_t$  and generates an output  
 175  $\mathbf{y}_t$  by running the following neural dynamics until it converges (Pehlevan 2019):

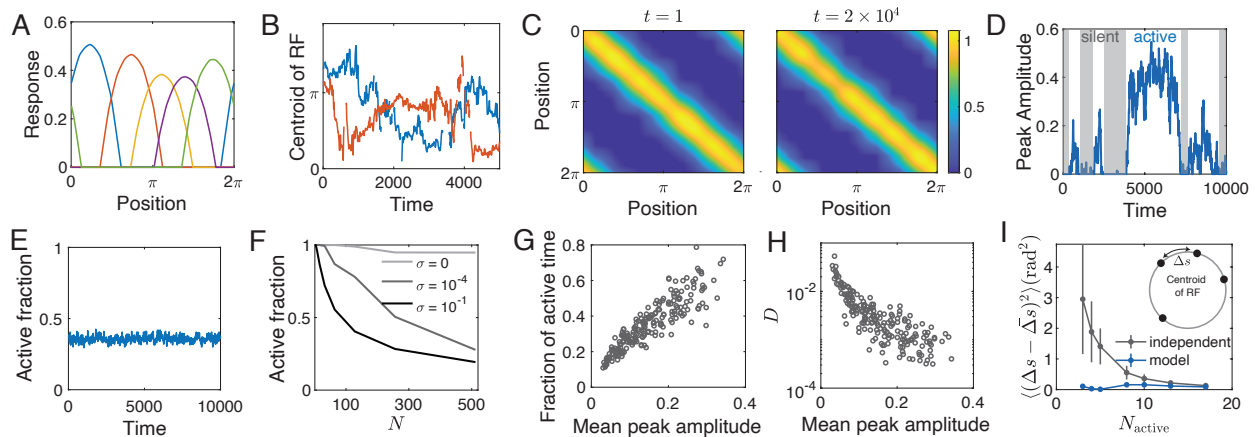

**Figure 4:** Drift of manifold-tiling localized RFs. (A) Learned localized RFs tile the input ring data manifold. Colors represent RFs of 5 example neurons. (B) Evolution of the RF centroids of two example neurons due to synaptic noise. (C) The representational similarity matrix  $\mathbf{Y}^\top \mathbf{Y}$  is approximately circulant and stable over time. (D) When there are large number of neurons, each neuron has active and silent (shaded region) periods. (E) At population level, the fraction of neurons with active RFs are constant. (F) The fraction of neurons that have active RFs decreases with the total number of output neurons, as well as the noise amplitude. (G-H) Neurons that have stronger RFs tend to have longer active time (G) and also are more stable as quantified by smaller effective diffusion constants  $D$  (H). (I) At population level, the drift of RFs are coordinated such that their centroids are more uniformly distributed compared to that of the independent random walk case, in which the step size follows the same distribution of the Hebbian/anti-Hebbian network model. Shown are the variance of distances between adjacent centroids. Parameters in C-G:  $N = 200$ ,  $\sigma = 0.002$ ,  $\eta = 0.05$ ,  $\alpha^2 = 0$  except  $\sigma = 0$  in B. In H:  $\eta = 0.05$ .

$$\frac{du_i}{d\tau} = -u_i + [\mathbf{W}\mathbf{x}_t]_i - \alpha b_i - [\bar{\mathbf{M}}\mathbf{y}_t]_i, \quad (7)$$

$$y_i = \max\{u_i/M_{ii}, 0\},$$

where  $u_i$  and  $y_i$  represent the membrane potential and firing rate of neuron  $i$ , and  $b_i$  is the bias term. The forward weight matrix  $\mathbf{W} \in \mathbb{R}^{k \times n}$  and lateral weight matrix  $\mathbf{M} \in \mathbb{R}^{k \times k}$  (we have defined  $\bar{\mathbf{M}} = \mathbf{M} - \text{diag}(\mathbf{M})$ ) update according to the following “noisy” learning rule (Pehlevan 2019):

$$\Delta \mathbf{W} = \eta(\mathbf{y}_t \mathbf{x}_t^\top - \mathbf{W}) + \boldsymbol{\xi}^W, \quad \Delta \mathbf{M} = \eta(\mathbf{y}_t \mathbf{y}_t^\top - \mathbf{M}) + \boldsymbol{\xi}^M, \quad \Delta \mathbf{b} = \eta(\alpha \mathbf{y}_t - \mathbf{b}), \quad (8)$$

where  $\eta$  is the learning rate, and  $\boldsymbol{\xi}^W$  and  $\boldsymbol{\xi}^M$  are Gaussian white noise terms with the same statistics as in (4). The properties of the above learning rule without noise has been studied previously (Földiák 1990; Pehlevan 2019; Pehlevan and Chklovskii 2014; Pehlevan, Mohan, and Chklovskii 2017; Sengupta et al. 2018). Here, our interest is investigating how the learned representations evolve in the presence of noise in synaptic updates. We will first study the general drifting dynamics of RFs by a simple input: a ring data manifold. Based on the insights gained from this model, we will build models of drifting representations in place cells and neurons in PPC.



## 192 Localized receptive fields on a ring stimulus manifold

193 To explore how RFs evolve in the presence of synaptic noise, we first consider stimuli living  
194 on a ring (Fig. 3A), like the direction of a drifting grating used in experimental study of visual  
195 systems. Location of the stimulus on the ring is parameterized by an angular variable  $\theta \in$   
196  $[0, 2\pi)$  (Materials and Methods). The input similarity matrix  $\mathbf{X}^\top \mathbf{X}$  has a diagonal band structure  
197 and two inputs that are close on the ring have large similarity.

198 In the case of a single output neuron and in the absence of noise, the learned RF can  
199 be solved analytically, which is a truncated cosine curve centered around a random angle  $\phi$ ,  
200 i.e.,  $y_\phi(\theta) = \mu[\cos(\theta - \phi)]_+$  with  $\mu$  being the peak amplitude. Derivation of this results and  
201 dependence of  $\mu$  to model parameters is given in Materials and Methods. With synaptic noise  
202 during learning, the centroid drifts on the ring like a random walk. We quantified the speed  
203 of drift with an effective diffusion constant,  $D$ , of the centroid by the conventional relation:  
204  $\langle (\phi(t + \Delta t) - \phi(t))^2 \rangle = 2D\Delta t$ , where  $\phi(t)$  is the centroid position at time  $t$ . For a single  
205 neuron, the dependence of  $D$  on the learning rate  $\eta$  and noise amplitude  $\sigma^2$  can be analytically  
206 approximated as (Materials and Methods, and SI Appendix):

$$D \approx \frac{1}{2}(\eta^2 + 16\eta\sigma^2). \quad (9)$$

207 The first term of (9) is due to the sampling noise, i.e., the fact that the network sees one random  
208 stimulus at a time, and the second term is due to the explicit synaptic noise (noise terms in  
209 (8)). (9) indicates that faster learning and larger explicit noise result in more rapid drift of the  
210 RF. Numerical simulation agrees well with the theory (Fig. 3C-D).

211 When there is a population of output neurons, the Hebbian/anti-Hebbian network learns  
212 multiple localized RFs that tile the ring manifold with overlap (Fig. 4A), consistent with previ-  
213 ous analytical accounts of simplified versions of such networks (Sengupta et al. 2018). With  
214 synaptic noise, we expect each RF to drift by a similar diffusion process as in the single neuron  
215 case, but with interactions between the neurons affecting the dynamics (Fig. 4B). In particular,  
216 the structure of neural population activity, as indicated by output similarity matrix  $\mathbf{Y}^\top \mathbf{Y}$ , is sta-  
217 ble across time (Fig. 4C). Further, a neuron's response to the same stimulus is intermittent,  
218 having active and silent periods (Fig. 4D). At the population level, the fraction of neurons that  
219 have active RFs at any given time is constant (Fig. 4E), and it decreases with total number  
220 of output neurons as well as the noise amplitude (Fig. 4F). Thus, in a large population of  
221 neurons, only a small fraction of them will be active at a give time, forming a sparse population  
222 code. Neurons whose RFs have stronger tuning (characterized by the peak amplitude of RF)  
223 tend to be active more often (Fig. 4G), and have smaller drift (Fig. 4H).

224 At the population level, the drift of RFs are coordinated. To see the difference between our  
225 model and independent random walkers, we simulated  $N_{\text{active}}$  centroids undergoing indepen-

226 dent random walks on the ring. The step size of the independent random walks were drawn  
227 from the same distribution as the centroid shift between two adjacent time steps in our model  
228 (Materials and Methods). We observed that centroids in our model tile the ring manifold more  
229 uniformly than those of independent random walks, as indicated by the smaller variance of  
230 distances between two adjacent centroids on the ring (Fig. 4I).

231 Having gained better understanding of drifting dynamics in the above simple model, we  
232 now discuss models of representational drift in the Hippocampus CA1 region and PPC. The  
233 observations made in Fig. 4 will conceptually carry over, providing explanations for previous  
234 experimental observations.

## 235 **A Hebbian/anti-Hebbian Network model for drifting place fields in CA1**

236 CA1 place cells in the hippocampus play a crucial role in spatial memory and navigation.  
237 Recent long-term recording experiments show that place coding by the population of CA1  
238 pyramidal cells are dynamic even when the animal is in the same familiar environment. In  
239 the time course of several weeks, some neurons lose their place fields while other previously  
240 non-place coding cells gain place fields. Despite the drift, the spatial information is preserved  
241 (Gonzalez et al. 2019; Y. Ziv et al. 2013).

242 One possible mechanism of place field formation is that CA1 place cells receive both for-  
243 ward input from grid cells in the entorhinal cortex and lateral competition from other place cells  
244 within the hippocampus (M.-B. Moser, Rowland, and E. I. Moser 2015). This motivated us  
245 to use the Hebbian/anti-Hebbian network to learn a place cell representation of a 2D square  
246 environment. Each position on the plane is represented by a population of grid cells with dif-  
247 ferent grid spacing, phases and offsets (Fig. 5A, Materials and Methods), which serves as the  
248 input  $\mathbf{x}_t$  to the network. After learning, some output neurons develop localized RFs (or place  
249 fields, Fig. 5B). This can be visualized by arranging each row of response matrix  $\mathbf{Y}$  into a  
250 square matrix, as shown in Fig. 5B. The population of output neurons tile the 2D environment,  
251 as indicated by the uniform distribution of centroids of place fields (Fig. 5B, right). Due to the  
252 noise in the weight update, place fields continuously drift over time (Fig. 5C). Despite the drift,  
253 representational similarity of positions in the 2D environment is stable (SI Appendix, Fig. S2A).  
254 We also observed that a place cell may lose its place field for some time and gain a new place  
255 field later on (SI Appendix, Fig. S2B). The intermittence of RFs is due to both the competition  
256 between RFs and the fluctuation of  $\mathbf{W}$  and  $\mathbf{M}$ . For example, once the forward input is smaller  
257 than the lateral inhibition at the centroid of an RF, then this RF becomes silent. The interval of  
258 these silent periods follow exponential distributions (SI Appendix Fig. S2C), indicating that the  
259 transition between active and silent state of RFs are random and memoryless. However, the  
260 fraction of neurons with active place fields at any given time remains constant (SI Appendix,

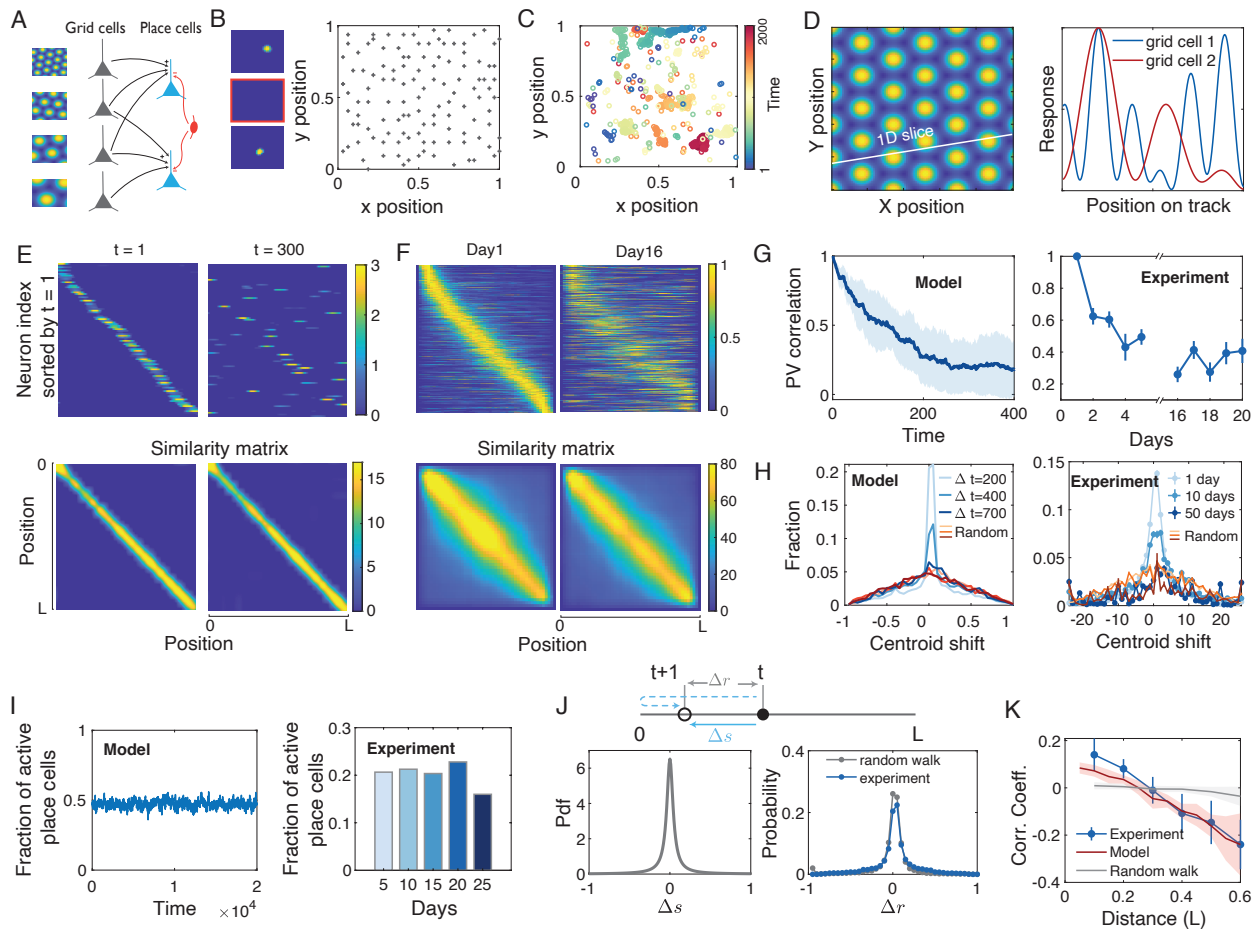

**Figure 5:** Drift of place fields. (A) Place cells receive input from grid cells that have different grid spacing, orientations and offsets. They also receive lateral inhibition due to competition with other place cells. (B) Left: learned place fields (left) tile the entire 2D plane with red square highlighting a silent neuron. Right: each dot represents a centroid of a place field. (C) Drift of place field of an exemplar place cell. Each circle represents the position of its centroid at different times. (D) Left: Slice through a 2D grid field. Right: Response of neurons across this slice. (E) Upper: learned place fields tile a 1D linear track when sorted by their centroid positions (left), but continuously change over time (right). Lower: Representational similarity matrix  $\mathbf{Y}^T \mathbf{Y}$  of position is stable over time. (F) Experimental results corresponding to (E), place fields of a group of CA1 place cells concatenated from several mice when exploring the same familiar 1D linear track. (G) The average autocorrelation coefficient of population vectors representing each spatial position in the model (left) and experiment (right) decay over time. Shades represent standard deviation over different positions. (H) Probability distribution of centroid drifts of place cells at three different time intervals. Red lines represent random distributions, which are obtained by randomly aligning place fields of neurons between the same interval. The qualitative behavior of the model (left) is very similar to that of the experimental result (right). (I) Despite the continuous reconfiguration of place cell ensembles, the fraction of active place fields are stable over time in the model (left) and experiment (right). (J) Centroid shift  $\Delta r = r(t+1) - r(t)$  observed in experiment could be a result of two different ‘random walks’ (blue lines) under reflecting boundary conditions (upper of J). To make a fair comparison with an independent random walk, we sample step sizes  $\Delta s$  of a random walk from a distribution  $p(\Delta s)$  (lower left of F) that produces similar shift distribution as in experiment  $p(\Delta r)$  (lower right panel of F). (K) Drifts of RFs show distance-dependent correlations, quantified by the average Pearson correlation coefficients. The model can recapitulate the behavior observed in experiment. Shades represent the standard deviation of different pairs of centroids. Experimental results in F-K are plotted using data from (Gonzalez et al. 2019). Parameters: (A)-(C)  $\beta_1 = 0.1, \beta_2 = 0.05, \eta = 0.02, \sigma = 0.01, N_p = 400$ . (D)-(I):  $N_p = 200, \alpha = 15, \sigma = 0, \eta = 0.01, \beta_1 = 0, \beta_2 = 0.05$ .

261 Fig. S2D).

262 As in the simple ring model in the previous section, we found that the drifts of individual RFs  
 263 can be largely captured by a random walk but with intermittence due to the inactive periods of  
 264 RFs. The drift speed can be quantified by an effective diffusion constant  $D$ . The dependence

265 of  $D$  on the number of neuron  $N$  is similar to the ring model in the previous section. When  $N$  is  
266 small, sampling noise dominates the synaptic update, resulting in a slight decrease of  $D$  as  $N$   
267 increases. However, beyond a certain  $N$ ,  $D$  increases rapidly with  $N$  (SI Appendix, Fig. S2E).  
268 Our model also predicts that neurons whose RFs have stronger tuning (larger peak amplitude  
269 of the RF) tend to be active more often, and have smaller drift (SI Appendix, Fig. S2F,G).

270 While the above predictions could be compared with long-term recording experiments for  
271 animals in a 2D environment, existing long-term recording experiments are limited to 1D envi-  
272 ronments (typically linear tracks). To compare our model with these experimental results, we  
273 simulated our model in a 1D environment, where grid cell responses are modeled as 1D slices  
274 through the 2D grid fields, as observed in experiments (Yoon et al. 2016)(Fig. 5D, Material  
275 and Methods). The model generates qualitatively similar results as the above 2D place cell  
276 model. The learned place fields tile the linear track but drift over time due to ongoing noisy  
277 weight updates, yet the representational similarity is stable over time (Fig. 5E). This is also  
278 observed in an experiment (Gonzalez et al. 2019), where CA1 pyramidal cells were recorded  
279 when mice were in the same familiar environment for several months (Fig. 5F). Due to drifting  
280 place fields, the autocorrelation coefficients of neural population vectors in both our model and  
281 in experiment decay over time (Fig. 5G). The shift of centroids of place fields increases with  
282 time, with a distribution eventually approaching the case wherein the place fields are randomly  
283 permuted. Such behavior closely resembles that of experiments (Gonzalez et al. 2019) (Fig.  
284 5H). Despite the continuous reconfiguration of the neural assemblies representing the position,  
285 the fraction of active place cells is stable over time (Fig. 5I).

286 To further explore the underlying structure of centroid shifts, and test the main prediction of  
287 our model that the drift of RFs is coordinated, we set out to compare the experiment and our  
288 simulation results to a null hypothesis — the shift of RFs behave like an independent random  
289 walk. To make a fair comparison, for the null hypothesis, we assume each centroid takes  
290 a step size  $\Delta s$  that is drawn from a distribution  $p(\Delta s)$  with a reflecting boundary condition  
291 (upper panel of Fig. 5J). The distribution  $p(\Delta s)$  was chosen such that the resulting centroid  
292 shift  $\Delta r$  closely matches that of experiment (lower left panel of Fig. 5J, Material and Methods).  
293 Centroid shifts in experiment show clear distance-dependent correlations, i.e., two RFs that  
294 are very close to each other are more likely to drift in the same direction on the next day,  
295 while RFs that are far apart are more likely to drift in opposite directions (blue line, Fig. 5 K).  
296 This is in stark contrast with the independent random walk picture (gray horizontal line, Fig.  
297 5 K), but can be recapitulated by our model (red line, Fig. 5 K), suggesting that the drift of  
298 RFs in experiment is coordinated at the population level, possibly to preserve representational  
299 similarity.

## 300 A Hebbian/anti-Hebbian network model for drifting RFs of neurons in 301 PPC

302 The above model and results can be extended to another sensorimotor task, in which mice  
303 were trained to navigate a virtual T-maze (Driscoll et al. 2017). At the first half of the T-stem,  
304 mice saw one of two alternative visual scenes, and associated them with left-turn or right-turn  
305 at the T-junction to receive a reward at the end of the track (Fig. 6A). PPC is essential for this  
306 task (Driscoll et al. 2017; Harvey, Coen, and Tank 2012). After learning, a sub-population of  
307 neurons in PPC have localized receptive fields, i.e., they fire when a mouse is at a specific  
308 position along the T-maze and their RFs tile the T-maze, providing essential information about  
309 the task. While mice stably perform the task after learning, the neural population activities  
310 in PPC continuously drift over weeks. Despite such drift, the task information can be stably  
311 encoded by the activities of a subpopulation of PPC neurons (Driscoll et al. 2017).

312 To better understand the positional tuning and drifting behavior of neurons in PPC, we  
313 again use a Hebbian/anti-Hebbian network with noisy weight update rule to model this system.  
314 For simplicity, the task information is represented by a vector  $\mathbf{x}_{R/L}(\theta) = [\cos(\theta), \sin(\theta), \pm 1]^T$ ,  
315  $\theta \in [0, \pi)$ , with the last entry indicating a right-turn (1) or a left-turn task (-1).

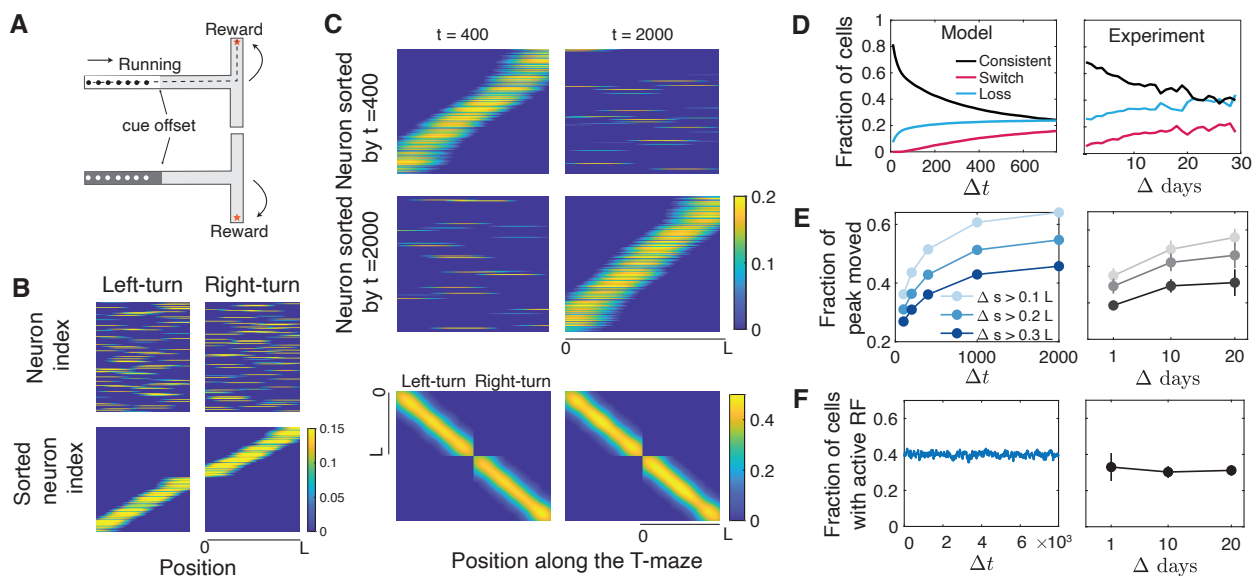

**Figure 6:** Representational drift in PPC. (A) Schematic of the visual-cue-guided T-maze sensorimotor task as in (Driscoll et al. 2017). The linear length of the track from the beginning to the end (dashed line) is  $L$ . (B) Population activity for the left-turn and right-turn task before (upper) and after (lower) sorting based on the centroids of their RFs. Only neurons that have active RFs at the given time point are shown. (C) Population activity drifts but representational similarity is stable over time. Activity of neurons identified with significant peak in the sorted time (upper and middle). Representational similarity matrix is stable for both left-turn and right-turn task (lower panels). (D) left: For a group of neurons that have tuning to left-turn (or right-turn) tasks, the fraction of them that have consistent tuning (black), switched tuning (magenta), losing tuning (cyan) to left (or right) in the following time. (E) Shift of RFs for neurons with a significant peak between time  $t$  and  $t + \Delta t$ . Smaller shift happens more often than larger shift. (F) The fraction of the neurons with active RFs is stable across time. In (D)-(F) Left panels are simulation results of our model, right panels are corresponding experiment results from (Driscoll et al. 2017). Parameters:  $N = 400$ ,  $\alpha^2 = 1.6$ ,  $\eta = 0.05$ ,  $\sigma = 10^{-4}$ ,  $\beta_1 = 10^{-4}$ ,  $\beta_2 = 10^{-3}$ .

316 After learning, the population of output neurons in the model develop positional tuning of  
317 the T-maze, i.e., for either left-turn input  $x_L$  or right-turn input  $x_R$ , there are a subpopulation of  
318 neurons that fire most strongly when the animal is at the specific positions of the track, forming  
319 RFs that tile the maze (Fig. 6B).

320 To see how the RFs of neurons evolve over time, we first sort neurons with significant  
321 RFs based on the centroid positions of their RFs at a reference time point. We find that RFs of  
322 neurons drift over time, i.e., neurons rarely have the same or similar RFs at two long-separated  
323 time points. However, the population representation of location-context information is stable  
324 across time. Thus, at any given time, we can identify a subset of neurons with significant  
325 RFs that tile the positions of the T-maze for both left-turn and right-turn tasks (Fig. 6C, upper  
326 and middle panels). Despite the drift, representational similarity of both left-turn and right-  
327 turn tasks are stable over time (Fig. 6C, lower panel). Neurons also gradually change their  
328 tuning to tasks choices. For example, a group of neurons that are tuned to the left-turn tasks  
329 at time 0 may loss such tuning or become tuned to right-turn tasks, and vice versa. Drift of  
330 an RF accumulates over time, such that the probability of centroid shift that is larger than a  
331 certain distance increases with time (left, Fig. 6E). Overall, the fraction of neurons that have  
332 positional tuning at any time for both left-turn and right-turn trials are constant (left, Fig. 6F). All  
333 these behavior are consistent with the experiment (right panels of Fig. 6D-F). Together, these  
334 comparisons shows that our simple model can explain many characteristics of representational  
335 drift in PPC.

## 336 Summary and Discussion

337 In this paper, we explored the hypothesis that representational drift is due to the existence of  
338 many (possibly infinite) ensembles of population codes that achieve a representational objec-  
339 tive. Noise in learning drives the network to explore this space, causing the drift of population  
340 activity. While our focus was on synaptic noise, other sources of noise can also cause similar  
341 representational drift with potentially different statistics. Similarly, network architectures that  
342 optimize other objective functions can also show drift when learning with noise. However, we  
343 expect the drift to be strongly affected by the degeneracy of the solution space of the objective  
344 function. For example, in a feedforward network performing online principal component anal-  
345 ysis, which has no degeneracy as the principal subspace projection task, we found stabilized  
346 representations in the presence of noise (Fig. S3, SI Appendix).

347 To explore the consequences of our hypothesis in a concrete model, we focused on a  
348 well-studied model for biologically plausible representation learning that optimizes similarity-  
349 based representational objectives (Pehlevan and Chklovskii 2019). We showed that simple

350 Hebbian/anti-Hebbian networks with noisy synaptic updates recapitulate observed represen-  
351 tational drift phenomena in experiments. In the case that the network consists of a single  
352 output neuron, we observed that its RF behaves like a random walk on the data manifold  
353 with a diffusion constant that depends on the noise amplitude, learning rate, and statistical  
354 structure of the input. When the network consists of many neurons, different drifting RFs are  
355 coordinated such that representational similarity is stable across time.

356 We used the Hebbian/anti-Hebbian network as a simplified model to study the RFs of hip-  
357 pocampal place cells and neurons in the PPC. Our model recapitulates the drift statistics at  
358 population-level observed in these regions: First, a constant fraction of active neurons rep-  
359 resent task variables at a given day. Second, neurons drop in and out of this assembly over  
360 days. As a consequence, the autocorrelation coefficient of population vectors decay over time.  
361 Third, drift at population level preserves representational similarity (Fig. 5,6). While simple,  
362 the network captures the essential properties of those neural circuits, i.e., RFs are shaped  
363 by input from upstream and effective lateral inhibition/competition within the layer. It is also  
364 possible to model these systems by training a general recurrent neural network (RNN), as has  
365 been demonstrated in (Rajan, Harvey, and Tank 2016). It will be interesting to see whether  
366 neurons in such RNN models with noisy weight update also show representational drift.

367 Our model makes several testable predictions. First, our model predicts that the drifts of  
368 RFs are coordinated. This coordination is arising from the existence of a representational ob-  
369 jective for the neural population as a whole. We verified this prediction in hippocampal data  
370 Fig. 5J,K. Second, it predicts that neurons whose synapses have faster turnover dynamics  
371 tend to drift more rapidly. For example, the lifetime of spines of pyramidal cells in hippocam-  
372 pus is about 1 to 2 weeks, much shorter than that of neocortex neurons (Attardo, Fitzgerald,  
373 and Schnitzer 2015). This suggests that representational drift should be more prominent in  
374 hippocampus than in neocortex. Furthermore, the lifetime of synapses can be perturbed by  
375 blocking receptors such as NMDA (Zuo et al. 2005), which will alter the stability of RFs. A  
376 definitive examination of this prediction requires experiments that both measure the life time of  
377 synapses and the long-term neural activity in brain regions that represent learned stereotyped  
378 behavior under unperturbed and perturbed states. While challenging, this is nonetheless be-  
379 coming within reach with new experimental techniques. Third, our model predicts that neurons  
380 with strongly tuned RFs should be more stable. This prediction can be tested by examining the  
381 amplitude of tuning curves (RFs) of individual neurons and their stability in long-term record-  
382 ing experiments. Furthermore, the strength of RFs can be perturbed by optogenetic tools to  
383 examine how it affects the stability of RFs.

384 Representational drift contradicts the hypothesis that stable neural activity is the substrate  
385 of stable behavior. However, there needs to be stable aspects of representations which pro-  
386 vide a substrate for stable downstream decoding and readout. Representational similarity can

387 be one such substrate for multiple reasons. First, our modeling shows that achieving stable  
388 representational similarity despite the drift of population activity is biologically plausible. Sec-  
389 ond, stable representational similarity may be a general internal structure of drifting neural  
390 population activity. For example, mouse visual cortices show strong representational drift yet  
391 the relation between population activities that represent different inputs remains stable and  
392 stereotyped (Deitch, Rubin, and Y. Ziv 2021). Conserved and stable internal structure of neu-  
393 ral activity has also been discovered in hippocampus and prefrontal cortex in free-behaving  
394 mice (Rubin et al. 2019). Third, experimental evidence is consistent with stable representa-  
395 tional similarity being a foundation for robust downstream decoding. Studies in monkey motor  
396 cortices have shown that stable geometry of latent population dynamics underlies stereotyped  
397 reaching tasks (Gallego et al. 2020) despite the inherently variable single neuron activities  
398 (Liberti et al. 2016; Rokni et al. 2007) (see however (Chestek et al. 2007; Katlowitz, Picardo,  
399 and Long 2018)). Interestingly, a recent experiment has shown that the spatial code of dif-  
400 ferent environments in the hippocampus are random in individual rodents but share the same  
401 geometry across different animals (Kinsky et al. 2018). Finally, preserving pairwise similarity  
402 of representations may provide some computational benefits. Recent unsupervised learning  
403 algorithms for image recognition, such as contrastive representational learning (Chen et al.  
404 2020) and “Barlow Twins” (Zbontar et al. 2021), are based on objectives that maximize rep-  
405 resentational similarity between a sample and its distorted/augmented versions. Such algo-  
406 rithms can achieve comparable performance to supervised learning algorithms. From a theo-  
407 retical point of view, the representational similarity matrix (or kernel) determines the number of  
408 sampled stimuli required to learn an accurate linear readout from a population code, indicating  
409 that performance need not suffer as long as the representational kernel is preserved (Bordelon  
410 and Pehlevan 2021).

411 A hypothesis for achieving stable readout despite time-varying neural activity is that the  
412 variation happens in the “coding-null space” (Druckmann and Chklovskii 2012; Kaufman et al.  
413 2014). Representations in our model exhibit drift in all dimensions, precluding the existence  
414 of such coding-null space. Similarly, a closer scrutiny of the response of PPC neurons in the  
415 ‘T-maze’ task showed that drift is not confined to a “coding null space” (Rule, Loback, et al.  
416 2020). Hence, an adaptive readout mechanism which involves synaptic plasticity to track and  
417 compensate the drift is required to achieve stable behavior (Rule, Loback, et al. 2020; Rule  
418 and O’Leary 2021). Whether and how such a mechanism is implemented in the brain remains  
419 an open question.

420 The ubiquity of representational drift raises the question of whether it is a biological feature  
421 or a bug. Representational drift may be desirable under certain circumstances (Mau, Has-  
422 selmo, and Cai 2020). For example, in a model of the bird song learning system, variation in  
423 the neural representation of the stereotyped behavior enables the system to adapt quickly to



424 a shift of target song, and to reduce error due to loss of neurons (Duffy et al. 2019). Drift can  
 425 accommodate new learning with minimal inference by continuously modifying existing mem-  
 426 ories (Mau, Hasselmo, and Cai 2020). Other authors proposed that noisy synaptic plasticity  
 427 and spine motility enable cortical networks of neurons to carry out probabilistic inference by  
 428 sampling from a posterior distribution of network configurations (Kappel et al. 2015). Such  
 429 sampling would lead to a representational drift as a byproduct.

## 430 Material and Methods

### 431 Similarity matching and the linear Hebbian/anti-Hebbian network

432 The linear Hebbian/anti-Hebbian network can be derived from (1). The detailed derivation can  
 433 be found in (Pehlevan, Hu, and Chklovskii 2015; Pehlevan, Sengupta, and Chklovskii 2018),  
 434 we sketch the main steps here. Starting from the cross term in (1), by introducing a new matrix  
 435 variable  $\mathbf{W} \in \mathbb{R}^{k \times n}$ , we obtain

$$-\frac{1}{T^2} \sum_{t=1}^T \sum_{t'=1}^T \mathbf{y}_t^\top \mathbf{y}_{t'} \mathbf{x}_t^\top \mathbf{x}_{t'} = -\frac{1}{T^2} \sum_{t=1}^T \mathbf{y}_t^\top \left[ \sum_{t'}^T \mathbf{y}_{t'} \mathbf{x}_{t'}^\top \right] \mathbf{x}_t = \min_{\mathbf{W} \in \mathbb{R}^{k \times n}} -\frac{2}{T} \sum_{t=1}^T \mathbf{y}_t^\top \mathbf{W} \mathbf{x}_t + \text{Tr} \mathbf{W}^\top \mathbf{W}. \quad (10)$$

436 Similarly, we can introduce another matrix variable  $\mathbf{M}$  for the quartic  $\mathbf{y}_t$  term in (1):

$$-\frac{1}{T^2} \sum_{t=1}^T \sum_{t'=1}^T \mathbf{y}_t^\top \mathbf{y}_{t'} \mathbf{y}_t^\top \mathbf{y}_{t'} = \frac{1}{T^2} \sum_{t=1}^T \mathbf{y}_t^\top \left[ \sum_{t'}^T \mathbf{y}_{t'} \mathbf{y}_{t'}^\top \right] \mathbf{y}_t = \max_{\mathbf{M} \in \mathbb{R}^{k \times k}} \frac{2}{T} \sum_{t=1}^T \mathbf{y}_t^\top \mathbf{M} \mathbf{y}_t - \text{Tr} \mathbf{M}^\top \mathbf{M}. \quad (11)$$

437 By substituting (10) and (11) into (1) and changing orders of optimization (Pehlevan, Sengupta,  
 438 and Chklovskii 2018) we get:

$$\min_{\mathbf{W} \in \mathbb{R}^{k \times n}} \max_{\mathbf{M} \in \mathbb{R}^{k \times k}} \frac{1}{T} \left[ 2 \text{Tr}(\mathbf{W}^\top \mathbf{W}) - \text{Tr}(\mathbf{M}^\top \mathbf{M}) + \min_{\mathbf{y}_t \in \mathbb{R}^{k \times 1}} l_t(\mathbf{W}, \mathbf{M}, \mathbf{y}_t) \right], \quad (12)$$

439 where

$$l_t(\mathbf{W}, \mathbf{M}, \mathbf{y}_t) = -4 \mathbf{x}_t^\top \mathbf{W} \mathbf{y}_t + 2 \mathbf{y}_t^\top \mathbf{M} \mathbf{y}_t. \quad (13)$$

440 The minimax problem (12) can be solved by the following two-step online algorithm. First,  
 441 minimizing (13) while keeping  $\mathbf{W}$  and  $\mathbf{M}$  fixed, which is solved by running the dynamics of  
 442 output variable  $\mathbf{y}_t$  until convergence

$$\frac{d\mathbf{y}_t}{dt} = \mathbf{W} \mathbf{x}_t - \mathbf{M} \mathbf{y}_t. \quad (14)$$

443 Second, after the convergence of  $\mathbf{y}_t$ , update  $\mathbf{W}$  and  $\mathbf{M}$  by gradient descent and gradient  
 444 ascent of (12) respectively:

$$W_{ij} \leftarrow W_{ij} + \eta(y_i x_j - W_{ij}), \quad M_{ij} \leftarrow M_{ij} + \eta(M_{ij} - y_i y_j). \quad (15)$$

445 The above learning algorithm (14), (15) can be naturally mapped onto a single-layer biologi-  
 446 cally plausible neural network, the linear Hebbian/anti-Hebbian network. Here,  $y_t$  is the neural  
 447 activity of the output,  $W$  and  $M$  are synaptic matrices of the forward and lateral connections  
 448 respectively. The synaptic update rule (15) is local since the change of a synapse only de-  
 449 pends on the activity of presynaptic and postsynaptic neurons.

## 450 Calculation of the rotational diffusion constant

451 An analytical calculation of the rotational diffusion constant, defined by (Hunter et al. 2011;  
 452 Kammerer, Kob, and Schilling 1997; Mazza et al. 2006),

$$D_\varphi \equiv \lim_{t \rightarrow \infty} \frac{1}{4t} \langle |\vec{\varphi}(t) - \vec{\varphi}(0)|^2 \rangle. \quad (16)$$

453 is difficult. However, we were able to obtain an approximation which matches numerical ex-  
 454 periments very well, as shown in Fig. 2E-G. We present the details of this derivation in the  
 455 SI Appendix. Our approximation assumes that 1) angular displacements of the representation  
 456 vectors after different time steps are not correlated, and 2) the network weights stay close to  
 457 the optimal representation manifold. Under these assumptions,  $D_\varphi$  can be approximated by  
 458 the mean squared angular displacement (MSAD),

$$D_\varphi \approx \frac{1}{4\Delta t} \langle |\Delta\vec{\varphi}|^2 \rangle, \quad (17)$$

459 where  $\Delta t$  is the small time interval elapsed during a single step update, and  $\Delta\vec{\varphi}$  arises from  
 460 a noisy synaptic update to the network with an optimal set of synapses. We calculate MSAD  
 461 analytically (SI) to arrive at (5).

462 To numerically estimate  $D_\varphi$  from trajectory of  $y(t)$  with total length of  $T$  time steps, we first  
 463 calculate  $\delta\vec{\varphi}$  at each simulation step, then estimate  $\vec{\varphi}(t)$  by cumulatively summing  $\delta\vec{\varphi}$  up to  
 464 time step  $t$ . Next, we estimate the MSAD of time interval  $\tau$  using all the pairs of  $\vec{\varphi}(t + \tau)$  and  
 465  $\vec{\varphi}(t)$ , which gives  $\langle |\Delta\vec{\varphi}|^2 \rangle = \langle |\vec{\varphi}(t + \tau) - \vec{\varphi}(t)|^2 \rangle$ . Last, we plot  $|\Delta\vec{\varphi}|^2$  as a function of  $\tau$  and fit  
 466 a line that pass the origin to the data. The slope of the best fit is then  $4D_\varphi$ .

## 467 Hebbian/anti-Hebbian network and nonnegative similarity matching

468 The nonlinear Hebbian/anti-Hebbian network (Eq. s(7) and (8)) can be derived from the gen-  
 469 eral nonnegative similarity matching (NSM) problem (Pehlevan 2019; Pehlevan and Chklovskii  
 470 2019). Denoting the input data as a set of vectors  $\mathbf{x}_{t=1, \dots, T} \in \mathbb{R}^n$  and the corresponding output  
 471 vectors  $\mathbf{y}_{t=1, \dots, T} \in \mathbb{R}^k$ , the NSM objective is defined as

$$\min_{\forall \mathbf{y}_t \geq 0} \frac{1}{T^2} \sum_{t, t'=1}^T (\mathbf{x}_t^\top \mathbf{x}_{t'} - \mathbf{y}_t^\top \mathbf{y}_{t'} - \alpha^2)^2 + \frac{1}{T} \sum_{t=1}^T (2\beta_1 \|\mathbf{y}_t\|_1 + \beta_2 \|\mathbf{y}_t\|_2^2), \quad (18)$$

472 where  $\alpha^2$  sets the threshold of similarity to be preserved in the output representation, the other  
 473 two regularizers  $\beta_1, \beta_2$  control the sparsity and amplitude of output. The detailed derivation of  
 474 (7) and (8) from (18) is described in (Pehlevan 2019).

475 To see why the above NSM objective (18) leads to localized RFs, we can consider the  
 476 simpler case where  $\beta_1 = \beta_2 = 0$  and a single pair of inputs. If two inputs are similar, i.e.,  
 477  $\mathbf{x}_1 \cdot \mathbf{x}_2 > \alpha^2$ , then the corresponding outputs  $y_1$  and  $y_2$  would prefer  $y_1 \cdot y_2 = \mathbf{x}_1 \cdot \mathbf{x}_2 - \alpha^2$ ,  
 478 i.e., they are also similar. In contrast, if two inputs are less similar, i.e.,  $\mathbf{x}_1 \cdot \mathbf{x}_2 < \alpha^2$ , due to  
 479 the nonnegativity of outputs,  $y_1, y_2$  they tend to be orthogonal:  $y_1 \cdot y_2 = 0$ . To achieve this,  
 480 dissimilar inputs must activate non-overlapping sets of neurons. Thus, in manifold learning, (18)  
 481 preserve local geometric structure in the  $\mathbf{y}$  representation space of the input data clouds. A  
 482 detailed explanation of why localized RFs are learned in a simplified version of (18) is provided  
 483 in (Sengupta et al. 2018).

484 The neural dynamics derived from (18) (with regularizers) differ from that in main text  
 485 slightly by changing the transfer function in (7) to

$$y_i = \max\{(u_i - \beta_1)/(\beta_2 + M_{ii}), 0\}. \quad (19)$$

## 486 Derivation of the diffusion constant of the ring model

487 We sketch the derivation of (9) here, more details are in SI Appendix. We again consider  
 488 the approximation that the diffusion coefficient can be approximated by the mean squared  
 489 displacement around a fixed point by a noisy synaptic update.

490 Consider a single output neuron that learns a RF from inputs that are on a ring manifold  
 491 (Fig. 3A). The response of the output neuron to  $\mathbf{x} = [\cos \theta, \sin \theta]^\top$  is

$$y(\theta) = \frac{1}{m + \beta} [w_1 \cos \theta + w_2 \sin \theta - \alpha b]_+, \quad (20)$$

492 where  $[x]_+$  denotes the rectified linear function and  $\beta$  is the  $l_2$  regularizer. The stationary state  
 493 parameters  $\{w_1^*, w_2^*, m^*, b^*\}$  satisfy the following conditions

$$\begin{aligned} 494 \langle w_1^* \rangle &= \langle y(\theta) \cos \theta \rangle_\theta, & \langle w_2^* \rangle &= \langle y(\theta) \sin \theta \rangle_\theta, \\ 495 \langle m^* \rangle &= \langle y^2(\theta) \rangle_\theta, & \langle b^* \rangle &= \alpha \langle y(\theta) \rangle_\theta. \end{aligned} \quad (21)$$

497 These equations can be solved self-consistently by assuming an ansatz of the form:

$$y_\phi(\theta) = \mu [\cos(\theta - \phi) - \cos(\psi)]_+, \quad \theta \in (-\pi, \pi], \quad (22)$$

which gives the dependence of  $\mu$  and  $\psi$  on  $\alpha, \beta$

$$\mu^2 = \frac{2\psi - \sin 2\psi - 4\beta\pi}{4\psi + 2\psi \cos 2\psi - 3 \sin 2\psi}, \quad \alpha^2 = \frac{\cos \psi (2\psi - \sin 2\psi)}{4(\sin \psi - \psi \cos \psi)}. \quad (23)$$

498 Using the fact that  $dy(\theta)/d\theta = 0$  at  $\theta = \phi$ , we have  $\tan \phi = w_2^*/w_1^*$  and

$$\frac{d\phi}{dt} = \frac{1}{\hat{\mu}} \left( \frac{dw_2}{dt} \cos \phi - \frac{dw_1}{dt} \sin \phi \right), \quad (24)$$

499 where  $\hat{\mu} = \sqrt{w_1^{*2} + w_2^{*2}}$  is the norm of weight vector. Using the noisy update rule (8) and (22),  
500 the shift of centroid due to one-step update eventually becomes

$$\Delta\phi = \frac{1}{\hat{\mu}} \{ \eta\mu [\cos(\theta - \phi) - \cos \psi]_+ \sin(\theta - \phi) + (\xi_2 \cos \phi - \xi_1 \sin \phi) \}. \quad (25)$$

501 Finally, using the relation  $\langle (\Delta\phi)^2 \rangle \approx 2D\Delta t$ , we have

$$D \approx \gamma\eta^2 + \frac{\eta\hat{\sigma}^2}{\hat{\mu}^2}, \quad (26)$$

502 where  $\hat{\sigma}^2 \equiv \sigma_1^2 \cos^2 \phi + \sigma_2^2 \sin^2 \phi$ , and

$$\gamma \equiv \frac{\mu^2}{\hat{\mu}^2} \langle ([\cos(\theta - \phi) - \cos \psi]_+^2 \sin^2(\theta - \phi)) \rangle_{\theta}. \quad (27)$$

503 When  $\alpha = \beta = 0, \sigma_1 = \sigma_2 = \sigma$ , we have  $\gamma = 1$  and  $\hat{\mu} = 1/4$ , (26) reduces to (9) in the main  
504 text.

## 505 Numerical simulation of 2D place cells

506 We considered a  $32 \times 32$  grid plane as the environment, each position  $(x, y)$  is represented  
507 by a group of grid cells with different grid spacings, orientations and offsets as observed in  
508 experiment (Stensola et al. 2012). The hexagonal firing fields of grid cells are modeled as a  
509 summation of three two-dimensional sinusoidal functions as in (Kropff and Treves 2008; Lian  
510 and Burkitt 2020; Solstad, E. I. Moser, and Einevoll 2006)

$$G(\mathbf{r}) = \frac{2}{3} \left( \frac{1}{3} \sum_{i=1}^3 \cos \left( \frac{4\pi}{\sqrt{3}l} \mathbf{e}_i \cdot (\mathbf{r} - \mathbf{r}_0) \right) + \frac{1}{2} \right), \quad (28)$$

511 where  $\mathbf{r} = [x, y]^T$  is the location on the plane,  $\mathbf{r}_0 = [x_0, y_0]^T$  is the phase offset,  $l$  is the grid  
512 spacing.  $\mathbf{e}_i = (\cos(2\pi i/3 + \theta), \sin(2\pi i/3 + \theta))$ ,  $i = 1, 2, 3$  is the unit vector in the direction  
513  $2\pi i/3 + \theta$  with  $\theta$  being the grid orientation. In the simulation, grid cells have 5 modules, i.e.,  
514  $N_l = 5$ . The value of  $l$  increases as geometric series with a ratio 1.42 that is consistent  
515 with experiment (Stensola et al. 2012). For example, in our simulation, the smallest spacing  
516 is  $0.2L$  with  $L$  being the linear length of the plane, then the rest spacing would be  $0.2 \times$   
517  $1.42L, \dots, 0.2 \times 1.42^{N_l-1}L$ . In each module, the number of orientation  $\theta$ ,  $N_\theta = 6$ , which are  
518 drawn uniformly in the range  $[0, \pi/3)$ . Similarly, the number of grid phase offsets  $x_0, y_0$  are  
519  $N_x = 5$  and  $N_y = 5$ , which are drawn uniformly in the range  $[0, l)$ . As result, the total number  
520 of grid cell is  $N_g = N_l N_\theta N_x N_y = 750$ .

## 521 Numerical simulation of 1D place cell

522 We consider a linear track with length  $L$ . Tuning curves of grid cells on the linear track are  
523 slices through 2D grid fields described above. The orientation of the slices are the same and  
524 randomly selected in the range  $[0, \pi/3]$ .

## 525 Autocorrelation coefficient of the population vector

526 In all the cases, the autocorrelation coefficient  $\rho$  of population vector is defined as the Pear-  
527 son's correlation coefficient between  $\mathbf{y}_t$  and  $\mathbf{y}_0$  to the same input:

$$\rho(t) = \frac{1}{n-1} \sum_{i=1}^n \left( \frac{y_{0,i} - \bar{y}_{0,i}}{\sigma_{y,0}} \right) \left( \frac{y_{t,i} - \bar{y}_{t,i}}{\sigma_{y,t}} \right), \quad (29)$$

528 where  $\bar{y}_0, \bar{y}_t$  are the mean of  $y_{0,i}$  and  $y_{t,i}$ ,  $\sigma_{y,0}, \sigma_{y,t}$  are the standard deviation of  $y_{0,i}$  and  $y_{t,i}$ .

## 529 Step size in independent random walks place fields

530 In Fig. 5J,K, the step size of independent random walks were drawn from a distribution  $p(\Delta s)$   
531 closely matching that of experiment. To determine this distribution, we first calculated the  
532 distribution of centroid shift between two adjacent days in experiment  $p(\Delta r)$  with  $\Delta r = r(t +$   
533  $1) - r(t)$ . For a random walk whose centroid is at position  $\hat{r}_t$ , its position at next time step is  
534  $\hat{r}_{t+1} = \hat{r}_t + \Delta s$  with  $\Delta s$  randomly sampled from  $p(\Delta s)$ . To constrain  $\hat{r}_{t+1}$  in the range of the  
535 track  $[0, L]$  with  $L$  being the length of the track, we assumed a reflecting boundary condition,  
536 which gives

$$\hat{r}_{t+1} = \begin{cases} |\hat{r}_t + \Delta s| & \hat{r}_t + \Delta s < 0 \\ 2L - (\hat{r}_t + \Delta s) & \hat{r}_t + \Delta s > L \\ \hat{r}_t + \Delta s & \text{other} \end{cases}$$

537 The shift of centroid in the random walk model is then determined by  $\Delta \hat{r} = \hat{r}_{t+1} - \hat{r}_t$  according  
538 to the above equation. Our aim is to find a distribution  $p(\Delta s)$ , such that  $p(\Delta \hat{r})$  is close to that  
539 of experiment  $p(r)$ . Based on the shape of  $p(r)$ , we searched  $p(\Delta s)$  from a family of Levy's  
540 alpha stable distribution (Samorodnitsky and Taqqu 2017) by minimizing the Kullback–Leibler  
541 divergence between  $p(r)$  and  $p(\hat{r})$ .

## 542 Data source and processing

543 Experimental data presented in Fig. 5 are originally described in (Gonzalez et al. 2019). We  
544 used the processed data and MATLAB code, which are available at the Caltech Research Data  
545 Repository (<https://doi.org/10.22002/d1.1229>) to produce these plots.

546 Experimental data presented in Fig. 6 is extracted from Figure 2C, 2D, and 4E of (Driscoll  
547 et al. 2017). The data is freely available in (Driscoll et al. 2020).

## 548 **Acknowledgements**

549 This work was supported by NIH (1UF1NS111697-01), the Intel Corporation through Intel  
550 Neuromorphic Research Community, and a Google Faculty Research Award. We thank Walter  
551 Gonzalez, Hanwen Zhang, Anna Harutyunyan and Carlos Lois for sharing the data on place  
552 cell recordings. We thank Laura Driscoll, Noah Pettit, Matthias Minderer, Selmaan Chettih and  
553 Christopher Harvey for making the T-maze experimental data available. We are grateful to  
554 members of Pehlevan group for helpful discussions, and Christopher Harvey for comments on  
555 the manuscript.

## 556 **Competing interests**

557 The authors declare no competing interests.

## References

- 558
- 559 Atick, J. J. and A. N. Redlich (Mar. 1992). “What Does the Retina Know about Natural Scenes?” In: *Neural*  
560 *Computation* 4.2, pages 196–210. DOI: [10.1162/neco.1992.4.2.196](https://doi.org/10.1162/neco.1992.4.2.196).
- 561 Attardo, Alessio, James E Fitzgerald, and Mark J Schnitzer (2015). “Impermanence of dendritic spines in live  
562 adult CA1 hippocampus”. In: *Nature* 523.7562, pages 592–596.
- 563 Attneave, Fred (1954). “Some informational aspects of visual perception.” In: *Psychological review* 61.3, page 183.
- 564 Barlow, H. (1961). “Possible principles underlying the transformation of sensory messages”. In: *Sensory Com-*  
565 *munication*, MIT Press.
- 566 Bordelon, Blake and Cengiz Pehlevan (2021). “Population Codes Enable Learning from Few Examples By Shap-  
567 ing Inductive Bias”. In: *bioRxiv*.
- 568 Chalk, Matthew, Olivier Marre, and Gasper Tkacik (2018). “Toward a unified theory of efficient, predictive, and  
569 sparse coding”. In: *Proceedings of the National Academy of Sciences* 115.1, pages 186–191.
- 570 Chen, Ting et al. (2020). “A simple framework for contrastive learning of visual representations”. In: *arXiv preprint*  
571 *arXiv:2002.05709*.
- 572 Chestek, Cynthia A et al. (2007). “Single-neuron stability during repeated reaching in macaque premotor cortex”.  
573 In: *Journal of Neuroscience* 27.40, pages 10742–10750.
- 574 Deitch, Daniel, Alon Rubin, and Yaniv Ziv (Oct. 2021). “Representational drift in the mouse visual cortex”. In:  
575 *Current Biology* 31.10, pages 1–13.
- 576 Driscoll, Laura N et al. (2017). “Dynamic reorganization of neuronal activity patterns in parietal cortex”. In: *Cell*  
577 170.5, pages 986–999.
- 578 — (2020). “Data from: Dynamic reorganization of neuronal activity patterns in parietal cortex dataset,” in: *Dryad*,  
579 *Dataset*. URL: <https://doi.org/10.5061/dryad.gqnk98sjq>.
- 580 Druckmann, Shaul and Dmitri B Chklovskii (2012). “Neuronal circuits underlying persistent representations de-  
581 spite time varying activity”. In: *Current Biology* 22.22, pages 2095–2103.
- 582 Duffy, Alison et al. (2019). “Variation in sequence dynamics improves maintenance of stereotyped behavior in an  
583 example from bird song”. In: *Proceedings of the National Academy of Sciences* 116.19, pages 9592–9597.
- 584 Földiak, Peter (1990). “Forming sparse representations by local anti-Hebbian learning”. In: *Biological cybernetics*  
585 64.2, pages 165–170.
- 586 Gallego, Juan A et al. (2020). “Long-term stability of cortical population dynamics underlying consistent behavior”.  
587 In: *Nature Neuroscience*, pages 1–11.
- 588 Gonzalez, Walter G et al. (2019). “Persistence of neuronal representations through time and damage in the  
589 hippocampus”. In: *Science* 365.6455, pages 821–825.
- 590 Harvey, Christopher D, Philip Coen, and David W Tank (2012). “Choice-specific sequences in parietal cortex  
591 during a virtual-navigation decision task”. In: *Nature* 484.7392, pages 62–68.
- 592 Hateren, Johannes H van (1992). “A theory of maximizing sensory information”. In: *Biological cybernetics* 68.1,  
593 pages 23–29.
- 594 Hazan, Liran and Noam E Ziv (2020). “Activity dependent and independent determinants of synaptic size diver-  
595 sity”. In: *Journal of Neuroscience* 40.14, pages 2828–2848.
- 596 Hubel, David H (1995). *Eye, brain, and vision*. Scientific American Library/Scientific American Books.
- 597 Hunter, Gary L et al. (2011). “Tracking rotational diffusion of colloidal clusters”. In: *Optics express* 19.18, pages 17189–  
598 17202.
- 599 Kämmerer, Stefan, Walter Kob, and Rolf Schilling (1997). “Dynamics of the rotational degrees of freedom in a  
600 supercooled liquid of diatomic molecules”. In: *Physical Review E* 56.5, page 5450.
- 601 Kappel, David et al. (2015). “Network plasticity as Bayesian inference”. In: *PLoS Comput Biol* 11.11, e1004485.

- 602 Katlowitz, Kalman A, Michel A Picardo, and Michael A Long (2018). “Stable sequential activity underlying the  
603 maintenance of a precisely executed skilled behavior”. In: *Neuron* 98.6, pages 1133–1140.
- 604 Kaufman, Matthew T et al. (2014). “Cortical activity in the null space: permitting preparation without movement”.  
605 In: *Nature neuroscience* 17.3, pages 440–448.
- 606 Kinsky, Nathaniel R et al. (2018). “Hippocampal place fields maintain a coherent and flexible map across long  
607 timescales”. In: *Current Biology* 28.22, pages 3578–3588.
- 608 Kriegeskorte, Nikolaus, Marieke Mur, and Peter A Bandettini (2008). “Representational similarity analysis-connecting  
609 the branches of systems neuroscience”. In: *Frontiers in systems neuroscience* 2, page 4.
- 610 Kropff, Emilio and Alessandro Treves (2008). “The emergence of grid cells: Intelligent design or just adaptation?”  
611 In: *Hippocampus* 18.12, pages 1256–1269.
- 612 Lee, Jae Sung et al. (2020). “The statistical structure of the hippocampal code for space as a function of time,  
613 context, and value”. In: *Cell* 183.3, pages 620–635.
- 614 Li, Ming et al. (2017). “Long-term two-photon imaging in awake macaque monkey”. In: *Neuron* 93.5, pages 1049–  
615 1057.
- 616 Lian, Yanbo and Anthony N Burkitt (2020). “Learning an efficient place cell map from grid cells using non-negative  
617 sparse coding”. In: *bioRxiv*.
- 618 Liberti, William A et al. (2016). “Unstable neurons underlie a stable learned behavior”. In: *Nature neuroscience*  
619 19.12, pages 1665–1671.
- 620 Luo, Thomas Zhihao et al. (2020). “An approach for long-term, multi-probe Neuropixels recordings in unrestrained  
621 rats”. In: *Elife* 9, e59716.
- 622 Marks, Tyler D. and Michael J. Goard (2021). “Stimulus-dependent representational drift in primary visual cortex”.  
623 In: *Nature Communications* 12.1, page 5169.
- 624 Mau, William, Michael E Hasselmo, and Denise J Cai (2020). “The brain in motion: How ensemble fluidity drives  
625 memory-updating and flexibility”. In: *Elife* 9, e63550.
- 626 Mazza, Marco G et al. (2006). “Relation between rotational and translational dynamic heterogeneities in water”.  
627 In: *Physical Review Letters* 96.5, page 057803.
- 628 Moser, May-Britt, David C Rowland, and Edvard I Moser (2015). “Place cells, grid cells, and memory”. In: *Cold  
629 Spring Harbor perspectives in biology* 7.2, a021808.
- 630 O’Keefe, John and Jonathan Dostrovsky (1971). “The hippocampus as a spatial map: Preliminary evidence from  
631 unit activity in the freely-moving rat.” In: *Brain research*.
- 632 Olshausen, Bruno A. and David J. Field (1997). “Sparse coding with an overcomplete basis set: A strategy  
633 employed by V1?” In: *Vision Research* 37.23, pages 3311–3325. ISSN: 0042-6989. DOI: [https://doi.org/  
634 10.1016/S0042-6989\(97\)00169-7](https://doi.org/10.1016/S0042-6989(97)00169-7).
- 635 Pehlevan, Cengiz (2019). “A spiking neural network with local learning rules derived from nonnegative similarity  
636 matching”. In: *ICASSP 2019-2019 IEEE International Conference on Acoustics, Speech and Signal Process-  
637 ing (ICASSP)*. IEEE, pages 7958–7962.
- 638 Pehlevan, Cengiz and Dmitri B Chklovskii (2014). “A Hebbian/anti-Hebbian network derived from online non-  
639 negative matrix factorization can cluster and discover sparse features”. In: *2014 48th Asilomar Conference  
640 on Signals, Systems and Computers*. IEEE, pages 769–775.
- 641 — (2019). “Neuroscience-inspired online unsupervised learning algorithms: Artificial neural networks”. In: *IEEE  
642 Signal Processing Magazine* 36.6, pages 88–96.
- 643 Pehlevan, Cengiz, Tao Hu, and Dmitri B Chklovskii (2015). “A hebbian/anti-hebbian neural network for linear  
644 subspace learning: A derivation from multidimensional scaling of streaming data”. In: *Neural computation*  
645 27.7, pages 1461–1495.



- 646 Pehlevan, Gengiz, Sreyas Mohan, and Dmitri B Chklovskii (2017). “Blind nonnegative source separation using  
647 biological neural networks”. In: *Neural computation* 29.11, pages 2925–2954.
- 648 Pehlevan, Gengiz, Anirvan M Sengupta, and Dmitri B Chklovskii (2018). “Why do similarity matching objectives  
649 lead to hebbian/anti-hebbian networks?” In: *Neural computation* 30.1, pages 84–124.
- 650 Peña, José Luis and Masakazu Konishi (2001). “Auditory spatial receptive fields created by multiplication”. In:  
651 *Science* 292.5515, pages 249–252.
- 652 Rajan, Kanaka, Christopher D Harvey, and David W Tank (2016). “Recurrent network models of sequence gen-  
653 eration and memory”. In: *Neuron* 90.1, pages 128–142.
- 654 Rao, Rajesh PN and Dana H Ballard (1999). “Predictive coding in the visual cortex: a functional interpretation of  
655 some extra-classical receptive-field effects”. In: *Nature neuroscience* 2.1, pages 79–87.
- 656 Rokni, Uri et al. (2007). “Motor learning with unstable neural representations”. In: *Neuron* 54.4, pages 653–666.
- 657 Rubin, Alon et al. (2019). “Revealing neural correlates of behavior without behavioral measurements”. In: *Nature*  
658 *communications* 10.1, pages 1–14.
- 659 Rule, Michael Everett, Adrianna R Loback, et al. (2020). “Stable task information from an unstable neural popu-  
660 lation”. In: *eLife* 9, e51121.
- 661 Rule, Michael Everett and Timothy O’Leary (2021). “Self-Healing Neural Codes”. In: *bioRxiv*.
- 662 Rule, Michael Everett, Timothy O’Leary, and Christopher D Harvey (2019). “Causes and consequences of repre-  
663 sentational drift”. In: *Current opinion in neurobiology* 58, pages 141–147.
- 664 Rumpel, Simon and Jochen Triesch (2016). “The dynamic connectome”. In: *Neuroforum* 22.3, pages 48–53.
- 665 Samorodnitsky, Gennady and Murad S Taqqu (2017). *Stable Non-Gaussian Random Processes: Stochastic Mod-  
666 els with Infinite Variance: Stochastic Modeling*. Routledge.
- 667 Schoonover, Carl E. et al. (2021). “Representational drift in primary olfactory cortex”. In: *Nature* 594.7864,  
668 pages 541–546. DOI: [10.1038/s41586-021-03628-7](https://doi.org/10.1038/s41586-021-03628-7).
- 669 Sengupta, Anirvan M et al. (2018). “Manifold-tiling localized receptive fields are optimal in similarity-preserving  
670 neural networks”. In: *Advances in Neural Information Processing Systems*, pages 7080–7090.
- 671 Solstad, Trygve, Edvard I Moser, and Gaute T Einevoll (2006). “From grid cells to place cells: a mathematical  
672 model”. In: *Hippocampus* 16.12, pages 1026–1031.
- 673 Srinivasan, Mandyam Veerambudi, Simon Barry Laughlin, and Andreas Dubs (1982). “Predictive coding: a fresh  
674 view of inhibition in the retina”. In: *Proceedings of the Royal Society of London. Series B. Biological Sciences*  
675 216.1205, pages 427–459.
- 676 Stensola, Hanne et al. (2012). “The entorhinal grid map is discretized”. In: *Nature* 492.7427, pages 72–78.
- 677 Ulivi, Alessandro F et al. (2019). “Longitudinal two-photon imaging of dorsal hippocampal CA1 in live mice”. In:  
678 *JoVE (Journal of Visualized Experiments)* 148, e59598.
- 679 Yoon, KiJung et al. (2016). “Grid cell responses in 1D environments assessed as slices through a 2D lattice”. In:  
680 *Neuron* 89.5, pages 1086–1099.
- 681 Zbontar, Jure et al. (2021). “Barlow twins: Self-supervised learning via redundancy reduction”. In: *arXiv preprint*  
682 *arXiv:2103.03230*.
- 683 Ziv, Yaniv et al. (2013). “Long-term dynamics of CA1 hippocampal place codes”. In: *Nature neuroscience* 16.3,  
684 page 264.
- 685 Zuo, Yi et al. (2005). “Long-term sensory deprivation prevents dendritic spine loss in primary somatosensory  
686 cortex”. In: *Nature* 436.7048, pages 261–265.

## Supplemental Material for: Coordinated drift of receptive fields during noisy representation learning

Shanshan Qin, Shiva Farashahi, David Lipshutz, Anirvan M. Sengupta, Dmitri B. Chklovskii, and Cengiz Pehlevan

### I. DERIVATION OF THE ROTATIONAL DIFFUSION CONSTANT THE IN THE LINEAR HEBBIAN/ANTI-HEBBIAN NETWORK

In this section, we derive an analytical expression for the rotational diffusion constant defined by [1, 2]

$$D_\varphi \equiv \lim_{t \rightarrow \infty} \frac{1}{4t} \langle |\vec{\varphi}(t) - \vec{\varphi}(0)|^2 \rangle, \quad (1)$$

where brackets mean averaging over different realizations of the noise. Obtaining an exact expression for  $D_\varphi$  is difficult, but we are able to derive an approximation that matches numerical experiments well, as shown in Figure 2 E, F and G of main text.

Our approach relies on two simplifications. First, we define the single-step angular displacement

$$\Delta\vec{\varphi}_i \equiv \vec{\varphi}(i) - \vec{\varphi}(i-1) \quad (2)$$

and note that

$$\langle |\vec{\varphi}(t) - \vec{\varphi}(0)|^2 \rangle = \sum_{i=1}^t \langle |\Delta\vec{\varphi}_i|^2 \rangle + \sum_{i=1}^t \sum_{j=1, i \neq j}^t \langle \Delta\vec{\varphi}_i \cdot \Delta\vec{\varphi}_j \rangle. \quad (3)$$

We assume that the correlation between angular displacements at different times is negligible. Therefore, we approximate

$$D_\varphi \approx \lim_{t \rightarrow \infty} \frac{1}{4t} \sum_{k=1}^t \langle |\Delta\vec{\varphi}_k|^2 \rangle. \quad (4)$$

Second, we assume that the network weights start at a configuration that is already an optimal solution to the similarity matching objective, projecting the input to its principal subspace, and the drift keeps the weights in the optimal solution space. This is a reasonable approximation because of a linear stability analysis presented in [3, 4]. We now review that argument. We refer an optimal solution to the similarity matching problem in the offline setting without noise as a fixed point and denote it with a  $\hat{\cdot}$ . We note that a general perturbation of feature map  $\delta\mathbf{F}$  around a fixed point  $\hat{\mathbf{F}} = \hat{\mathbf{M}}^{-1}\hat{\mathbf{W}}$  can be decomposed as

$$\delta\mathbf{F} = \delta\mathbf{A}\hat{\mathbf{F}} + \delta\mathbf{S}\hat{\mathbf{F}} + \delta\mathbf{B}\hat{\mathbf{G}}, \quad (5)$$

where  $\delta\mathbf{A}$  is a  $k \times k$  antisymmetric matrix,  $\delta\mathbf{S}$  is a  $k \times k$  symmetric matrix, and  $\hat{\mathbf{G}}$  is a  $(n-k) \times n$  matrix with orthonormal rows. These rows are chosen to be orthogonal to the rows of  $\mathbf{F}$ .  $\delta\mathbf{B}$  is a  $k \times (n-k)$  matrix [4]. So we have  $\delta\mathbf{A} + \delta\mathbf{S} = \delta\mathbf{F}\hat{\mathbf{F}}$ . The first term corresponds to a rotation of the neural filter basis of the principal subspace, the second term captures deviations from orthogonality of the basis vectors within the subspace, and the third term captures perturbations of the weight vectors that lead to projecting outside the principal subspace. As shown in [4], the fixed point is stable to the perturbation due to the second and third term, meaning they decay exponentially to zero, making a principal subspace projection linearly stable. Therefore, we consider drift due to the first term, which rotates neural filters and, in turn, the data cloud. We find that (see below) in this limit,  $\langle |\Delta\vec{\varphi}_i|^2 \rangle$  is independent of time step  $i$ . Therefore, our final approximation is

$$D_\varphi \approx \frac{1}{4\Delta t} \langle |\Delta\vec{\varphi}|^2 \rangle, \quad (6)$$

where  $\Delta t$  is the small time interval elapsed during a single step update, and  $\Delta\vec{\varphi}$  arises from a noisy synaptic update to the network with an optimal set of synapses. This quantity is called mean squared angular displacement (MSAD). This approximation turns out to match simulations very well as shown in Figure 2 E, F and G.

Next, we calculate  $D_\varphi$ . In the linear Hebbian/anti-Hebbian network for principle subspace projection task, the learning rule with synaptic noise is

$$\Delta\mathbf{W} = \eta(\mathbf{y}_t\mathbf{x}_t^\top - \mathbf{W}) + \boldsymbol{\xi}^W, \quad \Delta\mathbf{M} = \eta(\mathbf{y}_t\mathbf{y}_t^\top - \mathbf{M}) + \boldsymbol{\xi}^M, \quad (7)$$

where  $\langle \xi_{ij}^W(t) \rangle = \langle \xi_{ij}^M(t) \rangle = 0$  and  $\langle (\xi_{ij}^W(t) \xi_{kl}^W(t')) \rangle = \eta \sigma_1^2 \delta_{ik} \delta_{jl} \delta(t-t')$ ,  $\langle (\xi_{ij}^M(t) \xi_{kl}^M(t')) \rangle = \eta \sigma_2^2 \delta_{ik} \delta_{jl} \delta(t-t')$ . As discussed, by estimating the variance of the rotation the learned representation during a single-step update under rule (7), we can define an effective rotational diffusion constant that is related to this variance. More specifically, in the small update and noise regime,  $\delta \mathbf{A}$  is related to an infinitesimal rotation  $\mathbf{R}$  by  $\mathbf{R} = \exp \delta \mathbf{A} = \exp(\vec{\theta} \cdot \vec{\mathbf{L}})$ , where  $\vec{\mathbf{L}}$  is the infinitesimal rotation generator [5].  $\vec{\mathbf{L}}$  is a tensor, whose components can be written in matrix form.

We start by writing  $\delta \mathbf{F}$  in terms of the perturbation of  $\hat{\mathbf{W}}, \hat{\mathbf{M}}$ :

$$\delta \mathbf{F} = \hat{\mathbf{M}}^{-1} \delta \mathbf{W} - \hat{\mathbf{M}}^{-1} \delta \mathbf{M} \hat{\mathbf{M}}^{-1} \hat{\mathbf{W}} = \hat{\mathbf{M}}^{-1} (\delta \mathbf{W} - \delta \mathbf{M} \hat{\mathbf{F}}), \quad (8)$$

where we have used the property  $\hat{\mathbf{F}} \hat{\mathbf{F}}^\top = \mathbf{I}$ . Right-multiplying (8) by  $\hat{\mathbf{F}}$  and using (7), we have

$$\delta \mathbf{F} \hat{\mathbf{F}}^\top = \hat{\mathbf{M}}^{-1} (\delta \mathbf{W} \hat{\mathbf{F}}^\top - \delta \mathbf{M}) = \hat{\mathbf{M}}^{-1} \left( \eta (\mathbf{y} \mathbf{x}_t^\top - \hat{\mathbf{W}}) \hat{\mathbf{F}}^\top - \eta (\mathbf{y} \mathbf{y}^\top - \hat{\mathbf{M}}) + \boldsymbol{\xi}^W \hat{\mathbf{F}}^\top - \boldsymbol{\xi}^M \right) = \hat{\mathbf{M}}^{-1} (\boldsymbol{\xi}^W \hat{\mathbf{F}}^\top - \boldsymbol{\xi}^M), \quad (9)$$

where we have used the fact

$$\hat{\mathbf{M}}^{-1} \left( \mathbf{y}_t \mathbf{x}_t^\top - \hat{\mathbf{W}} \right) \hat{\mathbf{F}}^\top - \left( \mathbf{y}_t \mathbf{y}_t^\top - \hat{\mathbf{M}} \right) = \hat{\mathbf{M}}^{-1} \left( \mathbf{y}_t \mathbf{y}_t^\top - \hat{\mathbf{W}} \hat{\mathbf{F}}^\top - \mathbf{y}_t \mathbf{y}_t^\top + \hat{\mathbf{M}} \right) = -\hat{\mathbf{M}}^{-1} \hat{\mathbf{W}} \hat{\mathbf{F}}^\top + \mathbf{I} = \mathbf{0} \quad (10)$$

Now, the antisymmetric part  $\delta \mathbf{A} = \frac{1}{2} (\delta \mathbf{F} \hat{\mathbf{F}}^\top - \hat{\mathbf{F}} \delta \mathbf{F}^\top)$  can be written down explicitly:

$$\delta \mathbf{A} = \frac{1}{2} [(\hat{\mathbf{M}}^{-1} \boldsymbol{\xi}^W \hat{\mathbf{F}}^\top - \hat{\mathbf{F}} \boldsymbol{\xi}^{W\top} \hat{\mathbf{M}}^{-1}) + (\boldsymbol{\xi}^{M\top} \hat{\mathbf{M}}^{-1} - \hat{\mathbf{M}}^{-1} \boldsymbol{\xi}^M)]. \quad (11)$$

The mean squared angular displacement (MSAD) is related to  $\delta \mathbf{A}$ . To see this more clearly, consider a  $d$ -dimension rotation, which can be interpreted as rotation in a  $d-1$  dimensional hyperplane from one unit vector to another unit vector. Given any two  $d$ -dimensional orthogonal unit vector  $\mathbf{e}_1, \mathbf{e}_2$ , i.e.,  $\mathbf{e}_1^\top \cdot \mathbf{e}_1 = \mathbf{e}_2^\top \cdot \mathbf{e}_2 = 1$ ,  $\mathbf{e}_1^\top \cdot \mathbf{e}_2 = \mathbf{e}_2^\top \cdot \mathbf{e}_1 = 0$ . The generator for this rotation can be represented as

$$L_{\mathbf{e}_1 \mathbf{e}_2} = \mathbf{e}_2 \mathbf{e}_1^\top - \mathbf{e}_1 \mathbf{e}_2^\top. \quad (12)$$

Hence  $\delta \mathbf{A}$  can be expressed as  $\delta \mathbf{A} = \Delta \varphi L_{\mathbf{e}_1 \mathbf{e}_2}$ , with  $\Delta \varphi$  reflecting the rotation ‘amplitude’. Using the fact that  $\text{Tr}(L_{\mathbf{e}_1 \mathbf{e}_2} L_{\mathbf{e}_1 \mathbf{e}_2}^\top) = 2$ , we have

$$2(\Delta \varphi)^2 = \text{Tr}(\delta \mathbf{A} \delta \mathbf{A}^\top). \quad (13)$$

The variance of  $\delta A_{ij}$  is

$$\langle \delta A_{ij}^2 \rangle = \frac{\eta}{4} \left[ \sigma_1^2 \sum_{kl} (\tilde{M}_{ik} F_{jl} - \tilde{M}_{jk} F_{il})^2 + \sigma_2^2 \sum_k (\tilde{M}_{kj}^2 + \tilde{M}_{ki}^2) - 2\delta_{ij} \tilde{M}_{ki} \tilde{M}_{kj} \right] \Delta t, \quad (14)$$

where  $\tilde{\mathbf{M}} \equiv \hat{\mathbf{M}}^{-1}$  and the average  $\langle \rangle$  is over the noise distribution,  $\Delta t$  is the time interval of the single-step update.

Using the fact that  $\text{eig}(\hat{\mathbf{M}}) = [\lambda_1, \dots, \lambda_k]$  [4], and  $\text{Tr} \tilde{\mathbf{M}} = \sum_{i=1}^k 1/\lambda_i^2$ . We have

$$\langle \text{Tr} \delta \mathbf{A} \delta \mathbf{A}^\top \rangle = \sum_{ij} \langle \delta A_{ij}^2 \rangle = \frac{1}{2} \eta (k-1) \Delta t (\sigma_1^2 + \sigma_2^2) \sum_{i=1}^k \frac{1}{\lambda_i^2}, \quad (15)$$

where we have used the fact. We then define the rotational diffusion constant  $D_\varphi$  by the relation  $\langle |\varphi(t+\Delta t) - \varphi(t)|^2 \rangle = 2(k-1)D_\varphi \Delta t$ . With Eq.(13) and Eq.(15), we arrive Eq. 5 in the main text.

## II. DERIVATION OF THE EFFECTIVE DIFFUSION CONSTANT IN THE RING MODEL

Here, we calculate the diffusion constant in the ring model for a single output neuron, using the MSAD approximation as before.

We start from the simplest setup for the 1D place cell model: a single place cell which receives input from the ‘ring’ manifold, i.e., the position is parameterized as  $\mathbf{x} = [\cos \theta, \sin \theta]^\top$ . The response of the neurons is given by

$$y(\theta) = \frac{1}{m + \beta} [w_1 \cos \theta + w_2 \sin \theta - \alpha b]_+. \quad (16)$$

Here and after, we use  $[x]_+$  to denote the rectified linear function. We define a steady state where the average update to the weights is zero. Denoting the stationary state weights as  $\{w_1^*, w_2^*, m^*, b^*\}$ , this leads to the conditions:

$$\langle w_1^* \rangle = \langle y(\theta) \cos \theta \rangle_\theta, \quad \langle w_2^* \rangle = \langle y(\theta) \sin \theta \rangle_\theta, \quad \langle m^* \rangle = \langle y^2(\theta) \rangle_\theta, \quad \langle b^* \rangle = \alpha \langle y(\theta) \rangle_\theta, \quad (17)$$

Where  $\langle \cdot \rangle_\theta$  means averaging over  $\theta \in [-\pi, \pi)$  which is a uniform distribution. These equations can be solved self-consistently using an ansatz of the form:

$$y_\phi(\theta) = \mu[\cos(\theta - \phi) - \cos(\psi)]_+, \quad \theta \in [-\pi, \pi] \quad (18)$$

where  $\psi$  determines the “width” of the RF, and  $\mu(1 - \cos \psi)$  is the peak amplitude and  $\phi$  is the centroid of the receptive field. Plugging (18) into (16) and (17), we find that

$$\langle w_1^* \rangle = \frac{\mu}{4\pi} (2\psi - \sin 2\psi) \cos \phi, \quad (19)$$

$$\langle w_2^* \rangle = \frac{\mu}{4\pi} (2\psi - \sin 2\psi) \sin \phi, \quad (20)$$

$$\langle m^* \rangle = \frac{\mu^2}{4\pi} (4\psi + 2\psi \cos 2\psi - 3 \sin 2\psi), \quad (21)$$

$$\langle b^* \rangle = \frac{\alpha\mu}{\pi} (\sin \psi - \psi \cos \psi). \quad (22)$$

(16) can be rewritten as

$$y(\theta) = \frac{\sqrt{w_1^2 + w_2^2}}{m + \beta} \left[ \frac{w_1}{\sqrt{w_1^2 + w_2^2}} \cos \theta + \frac{w_2}{\sqrt{w_1^2 + w_2^2}} \sin \theta - \frac{\alpha b}{\sqrt{w_1^2 + w_2^2}} \right]_+ \quad (23)$$

Compared with (18), we have

$$\mu = \frac{\sqrt{w_1^{*2} + w_2^{*2}}}{m^* + \beta}, \quad \alpha b^* = \sqrt{w_1^{*2} + w_2^{*2}} \cos \psi. \quad (24)$$

Combining (19)-(22) and (24), we get the dependence of  $\mu$  and  $\psi$  on  $\alpha, \beta$ , given parametrically by

$$\mu^2 = \frac{2\psi - \sin 2\psi - 4\beta\pi}{4\psi + 2\psi \cos 2\psi - 3 \sin 2\psi}, \quad \alpha^2 = \frac{\cos \psi (2\psi - \sin 2\psi)}{4(\sin \psi - \psi \cos \psi)}. \quad (25)$$

Next, we proceed to estimate the drift due to noisy synaptic updates. From (23), we have

$$w_1^* \cos \phi + w_2^* \sin \phi = \sqrt{w_1^{*2} + w_2^{*2}} = \frac{\mu}{4\pi} (2\psi - \sin 2\psi) \equiv \hat{\mu}, \quad (26)$$

where we have defined  $\hat{\mu}$  to simplify the following notations. Using the fact that  $dy(\theta)/d\theta = 0$  at  $\theta = \phi$ , we have  $\tan(\phi) = w_2^*/w_1^*$  and

$$\frac{d\phi}{dt} = \frac{1}{\hat{\mu}} \left( \frac{dw_2}{dt} \cos \phi - \frac{dw_1}{dt} \sin \phi \right). \quad (27)$$

We are interested in how the centroid of the RF changes when a perturbation is added to the stationary weight vector

$$\Delta\phi = \frac{1}{\hat{\mu}} (\Delta w_2 \cos \phi - \Delta w_1 \sin \phi), \quad (28)$$

$$\Delta w_1 = \eta(y(\theta) \cos \theta - w_1^*) + \xi_1, \quad (29)$$

$$\Delta w_2 = \eta(y(\theta) \sin \theta - w_2^*) + \xi_2. \quad (30)$$

The Gaussian white noise terms have the following property:  $\langle \xi_1 \rangle = \langle \xi_2 \rangle = 0$ ,  $\langle \xi_1^2 \rangle = \langle \xi_2^2 \rangle = \eta\sigma^2\Delta t$  with  $\Delta t$  as the time interval between two adjacent update events. From (26), we have  $w_1^* = \hat{\mu} \cos \phi$ ,  $w_2^* = \hat{\mu} \sin \phi$ . Then  $\Delta\phi$  can be written as

$$\begin{aligned} \Delta\phi &= \frac{1}{\hat{\mu}} (\eta\mu[\cos(\theta - \phi) - \cos \psi]_+ \sin \theta \cos \phi - \eta\mu[\cos(\theta - \phi) - \cos \psi]_+ \cos \theta \sin \phi + (w_1^* \xi_2 - w_2^* \xi_1)) \\ &= \frac{1}{\hat{\mu}} \{ \eta\mu[\cos(\theta - \phi) - \cos \psi]_+ \sin(\theta - \phi) + (\xi_2 \cos \phi - \xi_1 \sin \phi) \} \\ &= \frac{1}{\hat{\mu}} \{ h_t(\theta, \phi, \psi) - (\xi_2 \cos \phi - \xi_1 \sin \phi) \}, \end{aligned} \quad (31)$$

where we have defined  $h_t(\theta, \phi, \psi) = \eta\mu[\cos(\theta - \phi) - \cos\psi]_+$ . Since in the online learning,  $\theta$  is sampled randomly, we can regard  $h_t$  as a stochastic process. Averaging over  $\theta$ , we have

$$\langle(\Delta\phi)^2\rangle = \frac{\mu^2}{\hat{\mu}^2}\eta^2\langle([\cos(\theta - \phi) - \cos\psi]_+^2 \sin^2(\theta - \phi))\rangle_\theta + \frac{1}{\hat{\mu}^2}(\cos^2\phi\langle\xi_2^2\rangle + \sin^2\phi\langle\xi_1^2\rangle) = \gamma\eta^2\Delta t + \frac{\eta\sigma^2}{\hat{\mu}^2}\Delta t, \quad (32)$$

where

$$\gamma \equiv \frac{\mu^2}{\hat{\mu}^2} \frac{1}{2\pi} \int_{-\pi}^{\pi} [\cos(\theta - \phi) - \cos\psi]_+^2 \sin^2(\theta - \phi) d\theta = \frac{\pi}{6} \frac{36\psi + 24\psi \cos(2\psi) - 28 \sin(2\psi) - \sin(4\psi)}{(2\psi - \sin(2\psi))^2} \quad (33)$$

Using the relation  $\langle(\Delta\phi)^2(\Delta t)\rangle = 2D\Delta t$ , we have

$$D \approx \gamma\eta^2 + \frac{\eta\sigma^2}{\hat{\mu}^2}, \quad (34)$$

where we use  $\approx$  because we calculate single-step MSAD.

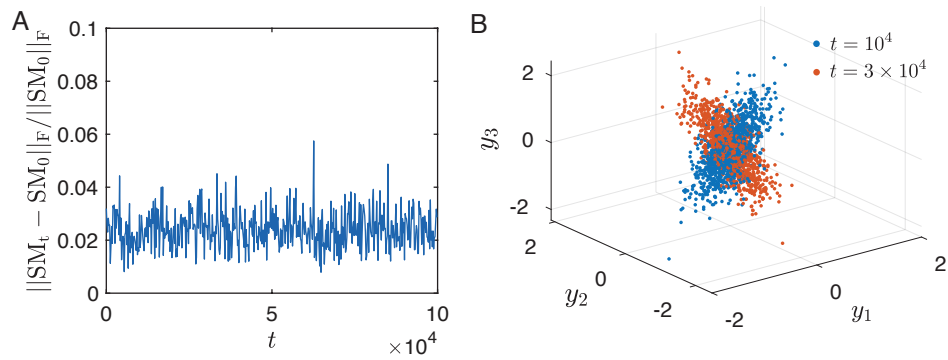

FIG. S1. (A) The relative change of Frobenius norm of the similarity matrix at time  $t$  compared with time point 0 in the PSP task. (B) Ensemble of output  $\mathbf{Y} \equiv [y_1, \dots, y_3]$  at two time points. The data clouds have ellipsoid shape. Related to figure 2 in the main text. Parameters are the same as in figure 2 of the main text.

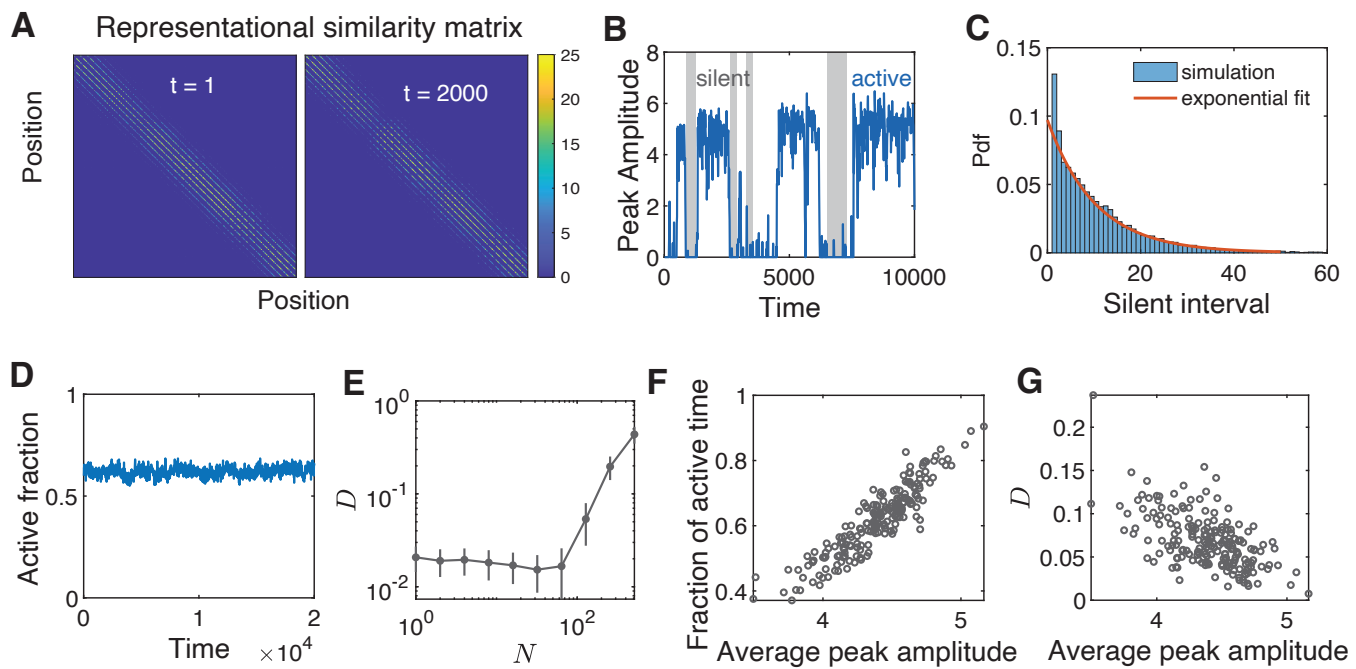

FIG. S2. Drift of 2D place cells in the model. (A) Representational similarity is preserved despite the continuous drift of place cell RFs. Positions on the plane are represented by an index from 1 to 1024. (B) The RFs are intermittent. The peak amplitude of an example place field has active and silent bouts. (C) The interval of silent bouts follow exponential distribution. (D) At population level, there is a constant fraction of active RFs over time. (E) Dependence of effective diffusion constant on the total number output neurons. (F,G) Place cells that have stronger place fields tend to be active more often (F) and also more stable as quantified by smaller diffusion constant (G). Parameters used are the same as Figure 5 in the main text.

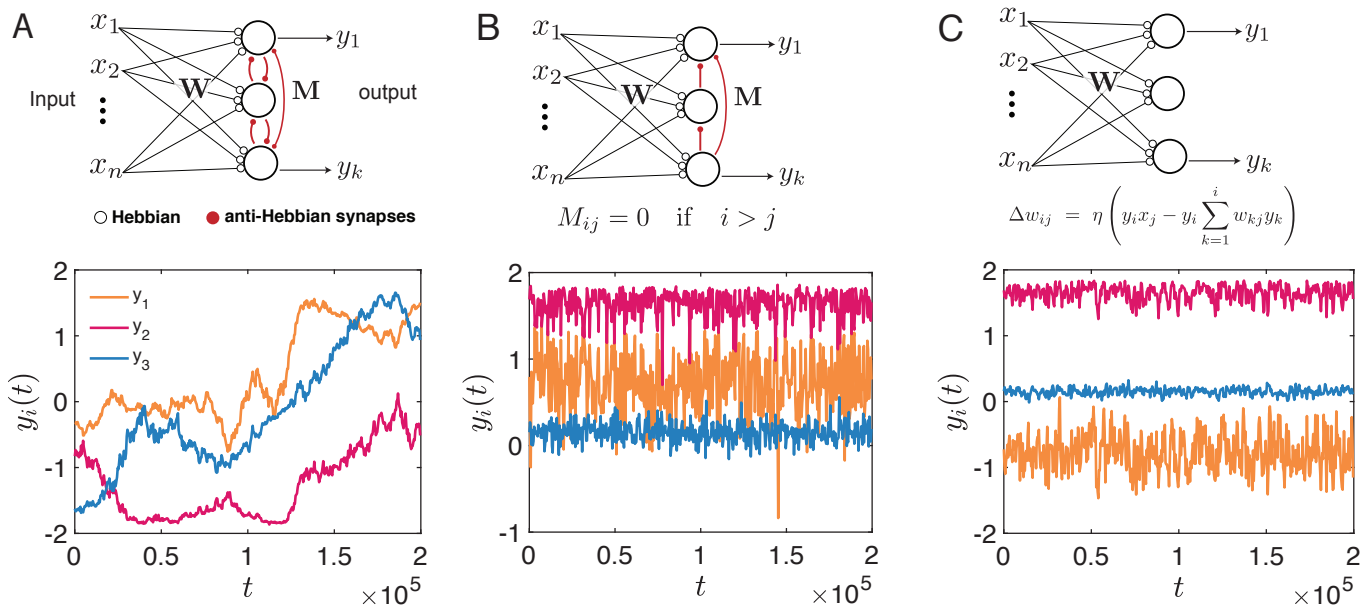

FIG. S3. Degeneracy of learning objective function and representational drift. We compare the long-term behavior of learned representations in three different networks. (A) Upper: the Hebbian/anti-Hebbian network for PSP. Lower: the evolution of the three components of a representation  $\mathbf{y}_t$ . (B) Upper: The network differs from Hebbian/anti-Hebbian network only in the lateral matrix  $\mathbf{M}$  which break the rotational symmetry of PSP solution. The learning rule is the same. Lower: the learned representation only fluctuates around an equilibrium. (C) A single feedforward network that perform online principle component analysis with Sanger’s rule [6]. This network has only feedforward input matrix  $\mathbf{W}$  and the learning rule is nonlocal. Lower: learned representation is relatively stable in the presence of noise. Parameters are the same as in the figure 2 of main text except that  $\eta = 0.01$ .

- 
- [1] S. Kammerer, W. Kob, and R. Schilling, Dynamics of the rotational degrees of freedom in a supercooled liquid of diatomic molecules, *Physical Review E* **56**, 5450 (1997).
- [2] M. G. Mazza, N. Giovambattista, F. W. Starr, and H. E. Stanley, Relation between rotational and translational dynamic heterogeneities in water, *Physical Review Letters* **96**, 057803 (2006).
- [3] C. Pehlevan and D. Chklovskii, A normative theory of adaptive dimensionality reduction in neural networks, in *Advances in neural information processing systems* (2015) pp. 2269–2277.
- [4] C. Pehlevan, A. M. Sengupta, and D. B. Chklovskii, Why do similarity matching objectives lead to hebbian/anti-Hebbian networks?, *Neural computation* **30**, 84 (2018).
- [5] A. Zee, *Group theory in a nutshell for physicists*, Vol. 17 (Princeton University Press, 2016).
- [6] T. D. Sanger, Optimal unsupervised learning in a single-layer linear feedforward neural network, *Neural networks* **2**, 459 (1989).
